# Supplementary material for: PML protein organizes heterochromatin domains where it regulates histone H3.3 deposition by ATRX/DAXX
Source: HighWire-hosted journal article supplement (doi:10.1101/gr.215830.116), 2017-03-24
Supplement: Supplemental_Tables.xlsx [file Supplemental_Tables.xlsx]

## Sheet: Table S1. PAD info
Supplemental Table 1. Genomic positioning of PADs and genes found in PADs.
	Nucleotide position		No. Genes
Chromosome	Start	End	in PAD	GeneNames
chr1	3000000	4490000	2	Xkr4	Rp1
chr1	5160000	6050000	3	Npbwr1	Oprk1	Atp6v1h
chr1	7640000	9430000	1	Sntg1
chr1	14780000	15770000	2	Kcnb2	Trpa1
chr1	18320000	19570000	2	Tfap2b	Tfap2d
chr1	24770000	25580000	2	Bai3	Gm20172
chr1	25840000	27270000	1	4931408C20Rik
chr1	31260000	33340000	4	Gm5415	Khdrbs2	Gm4850	Gm9839
chr1	34880000	35720000	0
chr1	40900000	41800000	1	4930448I06Rik
chr1	47990000	50340000	0
chr1	75710000	76410000	0
chr1	84930000	85340000	4	Slc16a14	A530032D15Rik	C130026I21Rik	Gm7609
chr1	96400000	97540000	4	Slco6b1	Slco6c1	Slco4c1	4930533P14Rik
chr1	98250000	105420000	5	Cdh20	Cntnap5b	Gm20268	Rnf152	Slco6d1
chr1	106900000	107400000	7	Serpinb13	Serpinb3d	Serpinb3b	Serpinb3c	Serpinb12	Serpinb3a	Serpinb11
chr1	108910000	109970000	0
chr1	110100000	111750000	2	Cdh19	Cdh7
chr1	112320000	118280000	1	Cntnap5a
chr1	120260000	120540000	3	Marco	Steap3	C1ql2
chr1	121580000	123500000	1	Dpp10
chr1	124560000	125320000	0
chr1	126000000	126290000	1	Nckap5
chr1	128590000	129290000	1	Cxcr4
chr1	129580000	130210000	1	Thsd7b
chr1	145620000	146250000	0
chr1	146980000	148620000	0
chr1	154280000	154860000	1	Cacna1e
chr1	157640000	158140000	0
chr1	172790000	173600000	14	Olfr1406	Olfr418-ps1	Cadm3	Aim2	Olfr1408	Pydc4	Darc	Apcs	Olfr1404	Mptx2	Olfr16	BC094916	Olfr218	Fcer1a
chr1	175890000	176660000	2	Exo1	Pld5
chr1	190180000	190760000	0
chr2	10450000	11320000	18	Mir669k	Mir467b	Mir467d	Mir669j	Mir467a-5	Mir669a-2	Prkcq	Mir467a-4	Mir467a-8	Mir467a-8	Sfmbt2	Mir669g	Mir297a-3,Mir297a-4,Mir297b	Mir467a-9	Mir669i	Mir467a-8	Mir669a-3	Mir467a-7
chr2	15170000	15520000	0
chr2	21300000	22420000	2	Gpr158	Myo3a
chr2	23570000	24180000	4	Il1f8	Tbpl2	Hnmt	Spopl
chr2	36380000	37320000	27	Olfr346	Olfr341	Olfr360	Olfr3	Olfr366	Olfr344	Olfr354	Olfr342	Olfr358	Olfr367-ps	Olfr50	Olfr345	Olfr361	Olfr339	Olfr355	Olfr347	Olfr357	Olfr353	Olfr352	Olfr356	Olfr340	Olfr351	Mir684-1	Olfr362	Olfr350	Olfr365	Olfr348
chr2	39500000	41410000	1	Lrp1b
chr2	53250000	53660000	0
chr2	55230000	55980000	1	Kcnj3
chr2	83030000	83590000	0
chr2	85590000	90380000	219	Olfr1042	Olfr1168	Olfr1265	Olfr1098	Olfr1216	Olfr1037	Olfr1211	Olfr1198	Olfr1112	Olfr1116-ps	Olfr52	Olfr1061	Olfr1023	Olfr1242	Olfr1016	Olfr1145	Olfr1220	Olfr1272	Olfr1014	Olfr1099	Olfr1206	Olfr142	Olfr1002	Olfr1257	Olfr73	Olfr1051	Olfr1030	Olfr1232	Olfr1261	Olfr1226	Olfr1254	Olfr1248	Olfr1046	Olfr1193	Olfr1056	Olfr1231	Olfr1111	Olfr1196	Olfr1217	Olfr1038-ps	Olfr1163	Olfr1131	Olfr1055	Olfr1086	Olfr1065	Olfr1130
chr2	94590000	95330000	0
chr2	97650000	99840000	0
chr2	105050000	105680000	6	AI314831	Wt1	Pax6os1	Pax6	Rcn1	0610012H03Rik
chr2	111100000	112040000	32	Olfr1306	Olfr1282	Olfr1284	Olfr1287	Olfr1305	Olfr1297	4930430A15Rik	Olfr1299	Olfr1281	Olfr1311	Olfr1302	Olfr1277	Olfr1276	Olfr1300-ps1	Olfr1309	Olfr1279	Olfr1275	Olfr1288	Olfr1307	Olfr1280	Olfr1295	Olfr1294	Olfr1278	Olfr1308	Olfr1289	Olfr1303	Olfr1286	Olfr1301	Olfr1298	Olfr1290	Olfr1310	Olfr1283
chr2	122840000	123980000	0
chr2	132850000	133320000	3	Lrrn4	Crls1	Fermt1
chr2	143240000	143810000	3	C630020P19Rik	Pcsk2	Gm12360
chr2	144720000	145080000	2	Dtd1	Scp2d1
chr2	149920000	150670000	12	Zfp345	E130215H24Rik	Zfp937	Apmap	Syndig1	3300002I08Rik	Zfp442	Cst7	Zfp120	Acss1	Gm14124	Gm14139
chr2	153780000	154300000	14	Bpifb4	Bpifb5	Bpifa6	Bpifb2	Bpifa5	Bpifb9a	Efcab8	Bpifa1	Bpifa2	Bpifb3	Bpifb1	Bpifb6	Sun5	Bpifa3
chr2	158880000	160520000	4	Gm826	9130015L21Rik	Mafb	4933416E03Rik
chr2	161220000	162860000	3	9430021M05Rik	C330008G21Rik	Ptprt
chr2	169040000	170070000	2	Tshz2	A630075F10Rik
chr2	170780000	172330000	4	1700028P15Rik	Dok5	Mc3r	Cbln4
chr2	174480000	175320000	6	Gm14391,Gm6710	Edn3	Gm14288,Gm14440	Zfp831	Gm14393	0610010B08Rik,Gm14430
chr2	176860000	177490000	2	Gm14405	Gm14420
chr2	178100000	178340000	1	Phactr3
chr2	178730000	179770000	2	Cdh4	4930591A17Rik
chr3	3000000	3490000	0
chr3	11630000	13170000	1	Gm10745
chr3	14040000	14420000	3	Ralyl	Gm6300	4930539N22Rik
chr3	15240000	15610000	3	Gm9733	Sirpb1b	Sirpb1a
chr3	15770000	17570000	3	Ythdf3	LOC100038947	Gm5150
chr3	22350000	22940000	0
chr3	26390000	26890000	1	Spata16
chr3	28990000	29710000	2	Mir551b	Egfem1
chr3	31290000	32310000	2	Kcnmb2	Slc7a14
chr3	33030000	33790000	2	Pex5l	4930419G24Rik
chr3	35280000	35680000	1	Gm6639
chr3	43750000	44710000	0
chr3	61760000	62470000	2	Arhgef26	Dhx36
chr3	64230000	64790000	6	Vmn2r4	Vmn2r6	Vmn2r-ps11	Vmn2r3	Vmn2r7	Vmn2r5
chr3	70910000	71550000	0
chr3	72140000	74740000	6	4930509J09Rik	Sis	Gm20754	Slitrk3	Gm20356	Bche
chr3	76500000	78760000	1	Fstl5
chr3	90690000	92420000	18	Sprr2e	Sprr2h	Lelp1	Sprr2g	Prr9	Sprr2b	S100a9	Lor	4930529C04Rik	Sprr2a1	Sprr2j-ps	Sprr2a1	Pglyrp3	9130204L05Rik	Sprr2d	Sprr2f	Pglyrp4	Sprr2i
chr3	93600000	94300000	9	Tdpoz3	Gm9125	Gm9125	Tdpoz2	Gm10696	Tdpoz4	Gm10697	Tdpoz5	Tdpoz1
chr3	98490000	98970000	8	Hao2	Hsd3b3	Gm10681,Hsd3b4	Hsd3b2	Hsd3b1	Hsd3b6	Gm10681,Hsd3b4	Hsd3b5
chr3	105140000	105670000	2	1700095B22Rik	Kcnd3
chr3	106010000	106470000	5	BC051070	Chi3l3	Pifo	Chia	Chi3l4
chr3	120730000	121090000	0
chr3	152930000	153860000	6	Asb17	2510003D18Rik	5730460C07Rik	St6galnac5	Msh4	St6galnac3
chr3	156840000	157510000	1	Negr1
chr4	20090000	21670000	1	Nkain3
chr4	22490000	22770000	0
chr4	23170000	23570000	0
chr4	25400000	25900000	1	Fut9
chr4	35270000	35700000	0
chr4	38130000	39290000	0
chr4	39600000	40120000	0
chr4	41790000	42380000	0
chr4	42440000	42840000	18	Gm13308	Gm13304	Gm21541	Gm13306,Gm2506	Il11ra2	Gm13298	Gm13308	Gm1987	Gm13298	Gm3893	Gm13298	Gm2002	Gm10591	Gm13308	4933409K07Rik,Ccl27b,LOC100861978	Gm10591	Ccl19	4933409K07Rik
chr4	48720000	49440000	2	E130309F12Rik	Acnat2
chr4	60360000	60840000	5	Mup10,Mup11,Mup2	Mup1	Mup9	Mup12	Gm2083
chr4	61400000	62020000	6	Gm2083,Mup19	Mup5	Gm2083,Mup17	Mup16	Mup14,Mup15,Mup2	LOC100048884
chr4	69130000	70220000	0
chr4	73230000	74120000	13	LOC100502924	Rasef	Gm11758,Gm13871	LOC100502924	Gm11487	Gm428,LOC100502924	Gm428	Gm11240	2310002L09Rik	Frmd3	Gm11756	Gm11758,Gm13871	Gm11758,Gm13871
chr4	74420000	75200000	0
chr4	77570000	78080000	1	Ptprd
chr4	79300000	80000000	0
chr4	80010000	80820000	0
chr4	89590000	91880000	4	Gm12633	Dmrta1	Elavl2	Zfp352
chr4	96040000	96460000	4	Cyp2j13	Cyp2j11	Cyp2j8	Cyp2j12
chr4	103360000	104920000	6	Oma1	Gm12718	C8a	C8b	1700024P16Rik	Dab1
chr4	110180000	110910000	3	Agbl4	Elavl4	Bend5
chr4	112100000	114330000	8	Skint2	Skint5	Skint9	Skint6	Skint4	Skint11	Skint3	Skint10
chr4	115120000	115700000	11	Cyp4x1	Cyp4a29-ps	Cyp4a10	Cyp4a30b-ps	Cyp4b1	Cyp4a32	Cyp4a31	Gm12839	Cyp4a12a	Cyp4a14	Cyp4a12b
chr4	118640000	119000000	14	Olfr1342	Olfr1339	Olfr62	Olfr1337	Olfr1335	Olfr1338	Olfr1333	Olfr1340	Olfr1328	Lao1	Olfr1331	Olfr1341	Olfr1330	Olfr1329
chr4	121230000	121770000	3	Gm12888	Gm12887	Gm12886
chr4	121830000	122360000	0
chr4	122410000	122800000	1	9530002B09Rik
chr4	123980000	124560000	1	1700057H15Rik
chr4	125160000	126030000	3	Grik3	2610028E06Rik	Csf3r
chr4	127380000	128600000	4	4930465A12Rik	CK137956	Hmgb4	Zscan20
chr4	130890000	131810000	3	Ptpru	Laptm5	Matn1
chr4	139990000	140520000	2	Igsf21	Arhgef10l
chr4	142280000	142470000	0
chr4	142490000	143050000	0
chr4	143420000	144850000	33	Gm13057	C87977	Pramel4	Gm13124	Oog4	9430007A20Rik	Pramef12	Gm13109	Aadacl3	Gm13103	Gm13178	Gm13128	Gm13102	Gm13177	BC080695	Pramef17	Gm13057	Gm13119	Gm13084	Gm436	Pramef8	Oog2	Gm438	Gm13125	1700012P22Rik	Gm13083	Oog3	Gm13023	Pramef6	Gm13088	Gm13078	Pramel5	Gm13040,Gm13043
chr4	145330000	145890000	5	Gm13212	Gm13242	Smarca5-ps	Gm13238	Gm13139,Znf41-ps
chr4	146900000	147820000	7	Gm13154	Gm13157	Rex2	2610305D13Rik	Gm13152	4933438K21Rik	Zfp534
chr4	152600000	153920000	2	Gm833	Ajap1
chr5	5760000	7960000	2	Zfp804b	4921511H03Rik
chr5	15460000	15740000	3	Speer4d	4930572O03Rik	Speer7-ps1
chr5	18560000	20590000	1	Magi2
chr5	22650000	22970000	2	Lhfpl3	A930003O13Rik
chr5	25910000	27750000	8	Dpp6	Gm10220	5031410I06Rik	Speer4b	Paxip1	Gm10471	Speer4a	4930584F24Rik
chr5	28420000	29250000	4	Lmbr1	9530036O11Rik	Rnf32	Shh
chr5	39890000	40810000	0
chr5	48470000	49260000	2	Kcnip4	5730480H06Rik
chr5	50150000	50930000	1	4930448I18Rik
chr5	51760000	52090000	0
chr5	54120000	56060000	2	Gm10440	Stim2
chr5	60510000	61140000	0
chr5	62200000	62600000	0
chr5	63060000	63900000	2	3110047P20Rik	0610040J01Rik
chr5	67760000	68070000	4	Atp8a1	Gm5108	4930425K10Rik	Grxcr1
chr5	70630000	72050000	5	Cox7b2	Gabrb1	Gabrg1	Gabra2	Gabra4
chr5	75170000	75770000	2	Kit	Pdgfra
chr5	77590000	78930000	1	Mir669m-1
chr5	83410000	84100000	1	Epha5
chr5	85210000	85850000	0
chr5	88020000	88520000	7	Enam	Amtn	Ambn	Prol1	Igj	Gm7714	Smr2
chr5	93370000	94080000	2	C87414	BC061212
chr5	94140000	96060000	13	D5Ertd577e,Gm3286	E330014E10Rik,Gm3286	Gm7978	Gm3139	A430089I19Rik	Gm3286	AA792892	AU018829	Gm6367	Cxcl13	A430089I19Rik	Gm3259	AU018829
chr5	99590000	99890000	1	A930011G23Rik
chr5	104580000	105210000	5	Gbp9	Zfp951	Abcg3	Gbp4	Gbp8
chr5	105950000	106400000	0
chr5	108750000	109510000	12	Vmn2r15	Vmn2r10	Vmn2r13	Vmn2r16	Vmn2r9	Vmn2r14	1700047L14Rik	Vmn2r11	Vmn2r12	Vmn2r8	Tmed11	Vmn2r17
chr5	112450000	112850000	5	Gm6588	Sez6l	Myo18b	1700034G24Rik	1700095B10Rik
chr5	116470000	117060000	2	2410137F16Rik	Srrm4
chr5	117560000	117880000	2	Ksr2	Nos1
chr5	119710000	120080000	1	Tbx5
chr5	125530000	128920000	12	1700085B03Rik	Tmem132c	Piwil1	4933438B17Rik	Glt1d1	4930572K03Rik	5930412G12Rik	Slc15a4	Fzd10	Tmem132d	Tmem132b	Rimbp2
chr5	129070000	129450000	1	Gpr133
chr5	130330000	130790000	3	A330070K13Rik	Tyw1	Caln1
chr5	130910000	131240000	1	Wbscr17
chr5	132120000	134060000	2	Auts2	4930563F08Rik
chr5	140890000	142310000	2	Sdk1	Card11
chr5	145320000	146210000	10	Rnf6	Cyp3a41a	Cyp3a16	Cyp3a41b	Cyp3a11	1700001J03Rik	Cyp3a25	Cyp3a44	Cyp3a57	Cyp3a59
chr6	7040000	7430000	0
chr6	8840000	9750000	1	Nxph1
chr6	10830000	11250000	1	AA545190
chr6	20080000	21210000	0
chr6	23600000	24500000	6	Rnf133	Iqub	Cadps2	Rnf148	Slc13a1	Tas2r118
chr6	26760000	27460000	2	Mir592	Grm8
chr6	31760000	32350000	3	B230378P21Rik	Plxna4	1700012A03Rik
chr6	41670000	42210000	10	Olfr459	Sva	Trpv5	Sval1	Sval2	Kel	Tas2r139	Pip	Sval3	1700034O15Rik
chr6	44090000	44650000	0
chr6	55490000	55920000	4	Adcyap1r1	Ccdc129	Gm3279	Neurod6
chr6	57860000	58580000	10	Vmn1r28	Vmn1r22	Vmn1r30	Vmn1r25	Vmn1r26	Vmn1r27	Vmn1r23	Vmn1r29	Vmn1r24	Vmn1r31
chr6	59500000	60550000	1	A530053G22Rik
chr6	62360000	63200000	2	A730020E08Rik	Ccser1
chr6	64160000	65030000	2	Grid2	Atoh1
chr6	65130000	65440000	2	Hpgds	C130060K24Rik
chr6	67540000	70710000	2	Rprl1	4930515G16Rik
chr6	73380000	75470000	1	4931417E11Rik
chr6	77630000	81000000	12	Ctnna2	Reg3g	Lrrtm4	Reg2	Reg1	Reg3b	Reg3a	Reg3d	Gm20362	Gm20594	6330415B21Rik	Lrrtm1
chr6	82300000	82610000	1	Tacr1
chr6	101700000	102720000	2	Gm9871	Cntn3
chr6	104790000	107970000	7	Il5ra	Gm19757	Crbn	Cntn4	Trnt1	Cntn6	Lrrn1
chr6	109230000	112200000	1	Grm7
chr6	113840000	114360000	3	Slc6a11	Atp2b2	Slc6a1
chr6	121380000	122250000	6	Gm10319	Mug2	Iqsec3	Mug1	Mug-ps1	A2m
chr6	122930000	124340000	19	Vmn2r27	Vmn2r23	Cd163	Vmn2r24	Clec4a4	Vmn2r25	Clec4b2	Clec4d	Clec4a3	Vmn2r19	Clec4n	Vmn2r22	Clec4b1	Clec4a1	Vmn2r26	Vmn2r21	Vmn2r20	Clec4e	Clec4a2
chr6	125610000	126030000	2	Ano2	Vwf
chr6	127510000	127920000	3	Tspan11	Prmt8	Efcab4b
chr6	129800000	130880000	10	Klra21,Klra8	Klra19,Klra6	Klra14	Klra7	Klra17	Klra1,Klra12,Klra13-ps,Klra15,Klra18,Klra22,Klra23,Klra33,Klra4	Klra10	Klra5	Klra3	Klra9
chr6	131440000	132560000	9	Gm4736,Gm8882,Prb1	Prpmp5	Tas2r104	Tas2r107	Tas2r130	5430401F13Rik	Tas2r106	Tas2r105	Tas2r114
chr6	133160000	133760000	2	Gm5885	5530400C23Rik
chr6	135530000	135980000	1	Grin2b
chr6	138050000	139290000	4	Mgst1	Igbp1b	Slc15a5	Lmo3
chr7	5110000	6090000	17	Vmn1r59	Nlrp4c	Rasl2-9	Vmn1r187,Vmn1r63	Vmn1r64	Vmn1r61	Rfpl4	Vmn1r60	Vmn1r57	Gm5065	Vmn1r56	Nlrp2	Vmn1r62	Vmn1r55	Vmn1r58	Vmn2r28	Vmn1r65
chr7	6440000	6690000	9	Olfr5	Olfr1348	Olfr1346	Olfr1344	Olfr1349	Olfr1350	Olfr1347	Zim1	Olfr1336
chr7	7340000	9550000	20	Vmn2r34	Vmn2r43	Vmn2r42	Vmn2r44	Vmn2r32	Vmn2r38	2810047C21Rik1	Vmn2r47	Vmn2r33	Vmn2r41	Vmn2r47	Vmn2r47	Vmn2r37	Vmn2r39	Vmn2r46	Vmn2r36	Vmn2r35	Vmn2r31	Vmn2r45	Vmn2r40
chr7	9640000	12800000	43	Vmn1r68	Vmn1r77	Vmn1r83	Vmn1r76	Vmn1r82	Gm4224	Vmn2r52	Vmn1r70	Vmn2r50	Vmn1r69	Zscan18	Vmn1r74	Zscan4a	Zik1	Vmn1r66	Zscan4e	Zfp606	2900092C05Rik	Vmn1r81	Zscan4f	Vmn1r78	Vmn1r75	Nlrp4b	Vmn2r47	Vmn1r72	Vmn2r55	Vmn2r53	Vmn2r56	Vmn1r73	Vmn1r80	Zfp551	Vmn1r71	Vmn1r79	Vmn2r54	Vmn1r67	Vmn2r51	Zscan4c	Vmn1r84	Zscan4b	Vmn2r48	Vmn2r49	Vmn2r46	Zscan4d
chr7	13410000	15880000	18	Obox2	Sult2a3	Sult2a1	Obox6	Sult2a6	Bsph1	2810007J24Rik	Sult2a7	Gm4745	Obox3	Bsph2	Obox1	Nlrp5-ps,Vmn1r90	Obox5	Crx	Sult2a5	Sult2a2	Sult2a4
chr7	17070000	18820000	23	Psg25	Sycp1-ps1	Ceacam13	Ceacam14	Igfl3	Psg27	Psg17	Ceacam12	Psg22	Psg-ps1	Ceacam11	Mill1	Ceacam3	Psg20	Psg21	Psg29	Psg16	Ceacam5	Psg26	Psg28	Psg19	Psg23	Psg18
chr7	20000000	21620000	44	Vmn1r125	Vmn1r113	Gm16451	Gm4567,Gm6902	Vmn1r119	Vmn1r129	Vmn1r112	Vmn1r124	Vmn1r94	Vmn1r115	Vmn1r111	Vmn1r116	Vmn1r114	Gm10666	Gm4141	Gm4172	Vmn1r107	Vmn1r95	Vmn1r123	Vmn1r126	Gm8660	Vmn1r120	Vmn1r118	Vmn1r122	Vmn1r100	Vmn1r-ps79	Gm4187	Vmn1r91	Vmn1r117	Nlrp9b	Vmn1r165	Vmn1r101	Vmn1r121	Gm4541	Vmn1r132	Gm6164	Vmn1r103	Vmn1r104	Vmn1r128	Gm10665	Vmn1r118	Vmn1r127	Gm5726	Gm4541
chr7	21670000	23890000	55	Vmn1r111	Gm5891	Vmn1r167	Vmn1r159	Gm4541	Gm8720	Gm6164	Vmn1r169	Vmn1r165	Gm8693	Gm10670	Vmn1r168	Vmn1r151	Vmn1r173	Gm5725	Vmn1r158	Gm4541	Gm4567,Gm6902	Vmn1r155	Vmn1r148	Vmn1r170	Vmn1r130	Vmn1r152	Nlrp5	Gm4141	Gm16451	Vmn1r172	Vmn1r135	Vmn1r132	Gm4216	Gm4498	Gm4541	Vmn1r163	Vmn1r176	Vmn1r93	Vmn1r174	Gm4175	Vmn1r177	Vmn1r171	Gm4175	Gm5726	Gm4177	Nlrp4e	Vmn1r149	Vmn1r142	Gm4187
chr7	25910000	26910000	13	Cyp2b13	Cyp2g1	Vmn1r185	Nlrp9a	Cyp2a4	Cyp2a5	Cyp2b9	Nlrp9c	Cyp2b19	Vmn1r184	Cyp2b23	Cyp2b10	Nlrp4a
chr7	31190000	34070000	16	Scgb1b27	Scgb1b24	Scgb1b7	Scgb2b2	Scgb1b2	Scgb2b7	Scgb2b26	Scgb1b3	Scgb2b20	Scgb1b29	Scgb2b27	Scgb2b19	Scgb2b24	Scgb1b20	Scgb2b23-ps	Scgb2b3
chr7	36180000	36660000	0
chr7	36770000	37240000	1	Tshz3
chr7	37390000	37790000	1	Zfp536
chr7	38280000	38630000	1	Gm5591
chr7	38690000	39000000	1	Gm21276
chr7	39110000	39480000	2	Zfp939	Gm5114
chr7	40090000	41350000	6	Vstm2b	4933402C06Rik	Gm4884	4930433I11Rik	A230077H06Rik	Gm5592
chr7	41980000	43250000	13	EU599041	Vmn2r59	Zfp936	Vmn2r63	Vmn2r61	Gm9268	Gm2381	Gm5595	Vmn2r-ps60	4933421I07Rik	Vmn2r62	Vmn2r60	9830147E19Rik
chr7	43620000	44240000	32	Klk1b8	Klk1b22	Klk5	Ceacam18	Klk1b11	Klk12	Klk1b4	Klk1b5	Klk1b21	Klk6	Klk11	Klk1b27	Klk1	Klk7	Klk1b3	Klk4	Klk1b7-ps	Klk8	Klk14	Siglece	Klk9	Klk1b24	Klk15	Klk1b9	Klk10	Egfbp2,Klk1b26	2310002F09Rik	Klk1b1	1700028J19Rik	Klk1b16	Ctu1	Klk13
chr7	47160000	48770000	15	Mrgpra3	Mrgpra9	Mrgpra6	Mrgpra4	Mrgpra2b	Mrgprb2	Mrgprb3	Mrgprb1	Mrgpra1	Mrgprb5	Mrgpra2a	Mrgprb8	Mrgprx2	Mrgprx1	Mrgprb4
chr7	49930000	51320000	4	Nell1	Slc6a5	1700081H22Rik	4933405O20Rik
chr7	52700000	55020000	1	Luzp2
chr7	56200000	58370000	6	Oca2	Gabrg3	Gm9962	Gabra5	Gabrb3	Herc2
chr7	59330000	59800000	11	Snord116l2	Snord116l2	Ipw	Snord116l1	Snord116l1	Snord116l2	Snord116	Snord116l1	Snord116l1	Snord116l2	Snord116l1
chr7	62470000	63530000	2	Otud7a	Chrna7
chr7	64450000	64770000	3	Fam189a1	Apba2	Ndnl2
chr7	71450000	71990000	0
chr7	75910000	76750000	0
chr7	76920000	77290000	1	Agbl1
chr7	85800000	87060000	23	Olfr293	Olfr307	Vmn2r77	Vmn2r75	Olfr292	Olfr297	Olfr298	Vmn2r73	Vmn2r78	Vmn2r79	Olfr301	Olfr308	Vmn2r76	Olfr303	Olfr294	Olfr305	Olfr295	Olfr304	Olfr299	Olfr310	Folh1	Vmn2r74	Olfr309
chr7	102690000	104190000	88	Olfr593	Olfr568	Olfr576	Olfr642	Olfr622	Olfr610	Olfr65	Olfr558	Olfr641	Olfr633	Olfr560,Olfr78	Olfr578	Olfr243	Olfr609	Olfr619	Olfr66	Olfr557	Olfr596	Olfr605	Olfr584	Olfr613	Olfr583	Olfr67	Olfr639	Olfr646	Olfr628	Olfr601	Olfr623	Olfr68	Olfr615	Olfr618	Olfr638	Olfr592	4931431F19Rik	Olfr635	Olfr564	Olfr561	Olfr575	Olfr585	Hbb-bh2	Olfr574	Olfr64	Olfr566	Olfr582	Olfr569	Olfr632
chr7	104620000	105360000	30	Olfr675	Olfr678	Olfr670	Olfr683	Olfr681	Olfr661	Olfr685	Olfr684	Olfr658	Olfr686	Olfr657	Usp17la	Olfr679	Olfr690	Olfr666	Olfr667	Olfr672	Usp17lb	Olfr669	Olfr689	Olfr691	Olfr663	Olfr671	Olfr676	Olfr688	Olfr665	Olfr659	Olfr668	Usp17le	Olfr677
chr7	106720000	108910000	72	Olfr467	Olfr711	Olfr484	Olfr493	Olfr6	Olfr497	Olfr713	Olfr486	Olfr512	Olfr705	Ovch2	Olfr704	Olfr478	Olfr699	Olfr701	Olfr513	Rbmxl2	Olfr488	Olfr482	Olfr498	Olfr469	Olfr509	Olfr698	Ppfibp2	Olfr494	Olfr490	Olfr514	Olfr485	Olfr17	Olfr487	Olfr473	Olfr519	Olfr479	Olfr470	Olfr703	Olfr1532-ps1	Olfr2	Syt9	Olfr706	Olfr495	Olfr504	Mir1970	Olfr707	Olfr491	Olfr508	Olfr700
chr7	116610000	118010000	1	Xylt1
chr7	119020000	119710000	8	Acsm5	Pdilt	Gpr139	Umod	Gp2	Acsm2	Acsm4	Acsm1
chr7	121140000	121530000	2	Hs3st2	Otoa
chr7	122290000	122920000	2	Cacng3	Prkcb
chr7	123480000	125380000	5	Zkscan2	4933440M02Rik	3100003L05Rik	Hs3st4	4930571K23Rik
chr7	128880000	129500000	1	Ppapdc1a
chr7	131760000	132180000	2	Cpxm2	Gpr26
chr7	135770000	136870000	2	Gm6249	C230079O03Rik
chr7	137550000	138780000	1	Tcerg1l
chr7	140150000	140570000	16	Olfr524	Olfr527	Olfr532	Olfr60	Olfr523	Cd163l1	5830411N06Rik	Olfr530	Olfr536	Olfr531	Olfr525	Olfr533	Sprn	Olfr522	Olfr535	Mtg1
chr8	3680000	4140000	11	Cd209a	Cd209g	Cd209b	Clec4g	Trappc5	Cd209f	Cd209d	Cd209c	Fcer2a	Rprl3	Cd209e
chr8	4770000	5610000	2	Slc10a2	Shcbp1
chr8	9240000	9960000	1	Fam155a
chr8	15130000	18470000	3	Csmd1	Myom2	Mir3106
chr8	19060000	19780000	16	Defa-ps13	Defb34	Defb46	Defb6	Spag11b	Defb7	4930467E23Rik,Gm21119	Defa-ps12	Defb39	Defb14	Defb12	Spag11a	Defb4	Defb5	Defb8	Defb3
chr8	20820000	22080000	47	Defb10	Defa-rs1	Defb1	Defb15	Defa26	Defa22	Gm15292	Gm15299	Gm15315	Alg11	Defa4,Gm10104	Defa20	Defa21	Gm14850	Gm6040	AY761185	Gm7849	Gm21944	Defb50	Gm14851	Gm21002	AY761184	Gm15056	Defb33	Gm15308	Defa-rs7	Gm6696	Defa17	Gm14850	Defa25	Defb13	Defa-ps1	Defb11	Defa24	Ccdc70	Nek5	Defa5	Atp7b	Defb35	Defb2	C86695	Gm15284	Defb9	Defa3	Gm15293	Gm7849
chr8	23520000	24090000	1	Zmat4
chr8	27270000	30440000	8	Unc5d	Gm9731	Poteg	Chrna6	Gm8096	Chrnb3	Tex24	Eif4ebp1
chr8	37210000	37860000	2	Mir383	Sgcz
chr8	57740000	60300000	3	Gm15881	Galntl6	BC030500
chr8	65110000	65720000	2	March1	BC030870
chr8	75410000	76560000	1	1700007B14Rik
chr8	88850000	90470000	2	Sall1	Tox3
chr8	93060000	93630000	7	Ces5a	Ces1g	Ces1f	Ces1b	Ces1e	Ces1c	Ces1d
chr8	95900000	101520000	3	Mir28c	Mir1186b	Cdh8
chr8	104650000	105110000	11	Ces2c	Ces2b	Ces2f	Ces2e	4932416K20Rik	Ces2g	Ces2h	Ces3a	Ces2a	Ces2d-ps	Ces3b
chr8	112020000	113420000	3	Terf2ip	Cntnap4	Gm10280
chr9	3040000	3310000	1	4930433N12Rik
chr9	8160000	8950000	4	1700128F08Rik	Pgr	Trpc6	Mir1899
chr9	9390000	13190000	2	4930568E12Rik	Cntn5
chr9	15780000	16090000	2	Fat3	Mtnr1b
chr9	16390000	17210000	0
chr9	18480000	19920000	28	Olfr856-ps1	Olfr853	Olfr860	Olfr828	Olfr855	Olfr859	Olfr832	Olfr846	Olfr837	Olfr24	Olfr77	Olfr834	Zfp317	Olfr845	Olfr850	Olfr857	Olfr854	Olfr862	Olfr835	Olfr836	Olfr58	Olfr847	Olfr849	Olfr829	Olfr851	Olfr830	Olfr843	Mbd3l1
chr9	25630000	26970000	4	Glb1l3	Glb1l2	B3gat1	Gm1110
chr9	28080000	30410000	2	Ntm	Opcml
chr9	35580000	36710000	19	Gm17677	Gm3434	Acrv1	Gm5916	Gm17365	Gm17252	1700027I24Rik	Gm17689	Gm7257	Chek1	Gm3428	D730048I06Rik	Gm5615	Gm9513	Pate2	Gm17727	9230110F15Rik	Pate4	A630095E13Rik
chr9	37940000	40190000	95	Olfr947-ps1	Olfr902	Olfr943	Olfr978	Olfr923	Olfr912	Olfr908	Olfr881	Olfr924	Olfr980	Olfr951	Olfr147	1700001J11Rik	Olfr934	Olfr899	Olfr958	Olfr26	Olfr890	Olfr961	Olfr983	Olfr974	Olfr919	Olfr894	Olfr907	Olfr979	Olfr917	Olfr945	Olfr982	Olfr968	Olfr229	Olfr954	Olfr938	Olfr957	Olfr920	Olfr986	Olfr976	Olfr948	Olfr242,Olfr27	Olfr913	Olfr885	Olfr889	Olfr971	Olfr952	Olfr884	Olfr1537	Olfr930
chr9	45130000	45790000	14	Cep164	Fxyd6	4833428L15Rik	Scn4b	Amica1	1700003G13Rik	Gm10684	Dscaml1	Tmprss13	Tmprss4	BC049352	Il10ra	Fxyd2	Scn2b
chr9	46350000	48260000	4	Gm10677	Gm4791	2900052N01Rik	Cadm1
chr9	48530000	48910000	3	Htr3a	Zbtb16	Nnmt
chr9	49100000	49480000	5	Drd2	Gm4894	Tmprss5	Ankk1	Ttc12
chr9	73990000	74860000	2	Gm16551	Wdr72
chr9	89270000	89660000	1	AF529169
chr9	97330000	98300000	3	Clstn2	Trim42	Nmnat3
chr9	99740000	100380000	2	Sox14	4930519F24Rik
chr9	101370000	102360000	1	Ephb1
chr9	103500000	103960000	2	4932413F04Rik	Tmem108
chr9	104380000	105360000	6	Nudt16	Mir2136	Cpne4	Nek11	Mrpl3	1700080E11Rik
chr9	109210000	109770000	10	Fbxw14	Fbxw16	Fbxw26	Fbxw28	Fbxw15	Fbxw24	Fbxw19	Fbxw22	Fbxw20	Fbxw18
chr9	115390000	115930000	1	Gadl1
chr10	11370000	11840000	1	Epm2a
chr10	35030000	35550000	0
chr10	45920000	47650000	1	Snord14d
chr10	49690000	50560000	1	Grik2
chr10	65090000	65680000	0
chr10	71380000	72470000	2	Ipmk	1700049L16Rik
chr10	73140000	74460000	1	Pcdh15
chr10	86930000	87370000	2	Stab2	1700113H08Rik
chr10	105890000	106470000	0
chr10	114500000	115070000	1	Trhde
chr10	129010000	129700000	32	Olfr790	Olfr799	Olfr774	Olfr769	Mir684-1	Olfr786	Olfr794	Olfr803	Olfr784	Olfr796	Olfr787	Olfr765	Olfr782	Olfr798	Olfr802	Olfr800	Olfr777	Olfr771	Olfr776	Olfr767	Olfr772	Olfr780	Olfr792	Olfr773	Olfr768	Olfr788	Olfr791	Olfr770	Olfr781	Olfr763	Olfr775	Olfr801
chr11	9230000	9820000	1	Abca13
chr11	10100000	11770000	4	Ikzf1	Vwc2	4930415F15Rik	Zpbp
chr11	12840000	16410000	3	Pom121l12	1700046C09Rik	Vstm2a
chr11	19120000	19640000	0
chr11	24120000	25850000	5	5730522E02Rik	4933427E13Rik	4933430M04Rik	Bcl11a	Gm10466
chr11	26930000	27630000	0
chr11	33890000	34540000	6	Foxi1	Kcnmb1	Dock2	Lcp2	Kcnip1	Fam196b
chr11	36210000	36670000	1	Tenm2
chr11	37480000	38360000	0
chr11	41450000	42140000	2	Gabrg2	Gabra1
chr11	47410000	48750000	0
chr11	52490000	53260000	3	Hspa4	Fstl4	Gm11186
chr11	65890000	66970000	4	Gm12298	Pirt	Shisa6	Dnahc9
chr11	71090000	71960000	5	Nlrp1a	4930401O10Rik	Wscd1	Nlrp1c-ps	Nlrp1b
chr11	73370000	74370000	32	Olfr389	Olfr402	Olfr395	Olfr378	Olfr406	Olfr23	Olfr392	Olfr75-ps1	Olfr397	Olfr393	Olfr399	Olfr394	Olfr391-ps	Olfr381	Olfr403	Zfp616	Olfr43	Olfr390	Zfp735	Olfr382	Olfr385	Olfr401	Olfr1	Olfr139	Olfr384	Olfr59	Olfr376	Olfr410	Olfr411	Olfr380	Olfr398	Olfr412
chr11	80920000	81850000	3	5530401A14Rik	Asic2	1700071K01Rik
chr11	82390000	82710000	2	Gm11426	Tmem132e
chr11	93540000	93810000	1	Car10
chr11	114140000	114650000	6	Dnaic2	Rpl38	4932435O22Rik	Mir466n	Ttyh2	1700092K14Rik
chr12	5570000	7480000	1	1700101O22Rik
chr12	10630000	11130000	2	7420701I03Rik	Kcns3
chr12	11870000	12880000	3	4921511I17Rik	Tubb2a-ps2	Fam49a
chr12	13660000	15460000	3	Gm16497	4930448C13Rik	Fam84a
chr12	17730000	21030000	3	5730507C01Rik	1700030C10Rik	Hpcal1
chr12	21630000	24460000	2	2410018L13Rik	9030624G23Rik
chr12	26490000	27330000	2	Gm20187	Gm9866
chr12	28790000	29880000	3	C630031E19Rik	Myt1l	Tssc1
chr12	47170000	49360000	1	Mir5125
chr12	59230000	64880000	3	Lrfn5	Fscb	Gm20063
chr12	68820000	69110000	0
chr12	82950000	83480000	3	1700085C21Rik	Dpf3	Rgs6
chr12	87820000	89430000	14	Mir466b-3	Adck1	BB287469	Gm5039	Gm2016	Gm2042	3200001D21Rik	Nrxn3	Gm1995	Gm10436	Gm7104	Gm5662	Gm2022	Gm16381
chr12	91930000	92760000	0
chr12	101090000	101620000	2	Kif4-ps	Catsperb
chr12	106080000	107750000	3	4933406K04Rik	1700121N20Rik	4930465M20Rik
chr12	113270000	116030000	2	Adam6b	Adam6a
chr12	116490000	118180000	7	Cdca7l	Mir153	Dnahc11	Gm10421	Rapgef5	Ptprn2	Gm5441
chr13	6690000	8740000	1	Adarb2
chr13	9890000	11040000	1	Chrm3
chr13	11090000	12080000	2	Zp4-ps	Ryr2
chr13	18070000	18590000	2	4930448F12Rik	Pou6f2
chr13	20470000	21110000	3	Aoah	Olfr1370	Elmo1
chr13	22070000	23280000	37	Vmn1r205	Vmn1r196	Vmn1r189	Vmn1r220	Vmn1r197	Vmn1r198	Vmn1r207-ps	Vmn1r195	Vmn1r209	Vmn1r202	Vmn1r223	Vmn1r210	Vmn1r200	Vmn1r211	Vmn1r219	Vmn1r215	Vmn1r192	Vmn1r203	Vmn1r204	Vmn1r216	Vmn1r221	Vmn1r218	Vmn1r208	Vmn1r222	Vmn1r217	Vmn1r193	Vmn1r194	Vmn1r213	Vmn1r191	Vmn1r201	4933404K08Rik	Vmn1r199	Vmn1r-ps103	Vmn1r212	Vmn1r214	Vmn1r188	Vmn1r206
chr13	40240000	40610000	1	Ofcc1
chr13	49780000	50840000	10	Gm906	Gm806	Mir683-1	2310081J21Rik	2310081J21Rik	4930518P08Rik	Gm8765	Gm904	Mir683-1	Fbxw17
chr13	56800000	57940000	2	Trpc7	Spock1
chr13	58720000	59440000	2	4930455J16Rik	Ntrk2
chr13	60750000	61790000	18	Ctsj	Ctsr	Tpbpb	4930486L24Rik	Cts3	Cts7	Cts6	Ctsll3	Tpbpa	Ctsq	Dapk1	Ctla2b	Ctla2a	Cts8	Cts8-ps	BC052688	BC051665	Ctsm
chr13	65290000	66890000	3	2410141K09Rik	Gm10324	Zfp369
chr13	67870000	68540000	0
chr13	69730000	70560000	4	Med10	4930520P13Rik	Ube2ql1	1700084F23Rik
chr13	72660000	73330000	3	D730050B12Rik	Irx4	Ndufs6
chr13	83760000	84140000	1	2810049E08Rik
chr13	87130000	87680000	0
chr13	105470000	106070000	0
chr14	3000000	7720000	30	Gm3264	Gm10409,Gm3020	Gm10408	Gm3494	Gm5795	Gm10413,Gm5795	Gm10409,Gm3020	4930555G01Rik	D830030K20Rik	Gm3558	1700110I01Rik	Gm3500	1700110I01Rik	Gm10406	LOC100861615	Gm5797	D830030K20Rik	Gm5796	1700110I01Rik	4933406F09Rik	Gm10408	Gm3696	Gm3264	Gm3317	Gm2897	Gm3383	Gm3383	Gm10413,Gm5795	Gm3500	Gm3002
chr14	12430000	12970000	1	Cadps
chr14	14990000	15500000	2	Lrrc3b	Nek10
chr14	18980000	19410000	0
chr14	32560000	33100000	8	Vstm4	Fam170b	Lrrc18	3425401B19Rik	Prrxl1	Wdfy4	Ercc6	1810011H11Rik
chr14	33570000	33880000	1	Ptpn20
chr14	34820000	36790000	4	Mir346	4930596D02Rik	4930474N05Rik	Grid1
chr14	37180000	40900000	4	Nrg3	4930529F24Rik	Sh2d4b	1700109I08Rik
chr14	41090000	41780000	6	Gm10377	Mat1a	Sftpd	Mbl1	Sftpa1	Dydc1
chr14	41890000	42860000	2	1700091H14Rik	Gm10377
chr14	43540000	44980000	12	Ear1	Ptgdr	BC061237	4930503E14Rik	1700047E10Rik	Ear10	Ang6	Ang3,Ang5	4930431P03Rik	Ear2,Ear3	Gm8267	Gm10375
chr14	49470000	50780000	32	Ttc5	Olfr739	Olfr735	Olfr731	Olfr738	Olfr733	Olfr723	4930413M19Rik	Olfr736	Olfr730	Olfr722	Olfr743	Olfr745	Olfr740	Tlr11	Olfr732	Olfr747	Olfr728	Olfr734	3632451O06Rik	Slc35f4	Olfr744	Olfr729	Olfr742	Olfr746	Olfr749	Olfr724	Olfr726	Olfr748	Olfr725	Olfr741	Olfr727
chr14	51180000	51840000	10	AY358078	Gm5800	Ear4	Ear11	Vmn2r88	Ang4	Gm5622	Vmn2r89	4930597G03Rik	Ang2
chr14	52370000	53570000	6	Olfr1508	Olfr1512	Olfr1509	Olfr1511	Olfr1510	Olfr1507
chr14	68130000	68530000	3	Nefm	Adam7	A230070E04Rik
chr14	70790000	71060000	2	Gfra2	2410012E07Rik
chr14	71360000	72370000	1	4930434J06Rik
chr14	79760000	81170000	3	Gm10845	Pcdh8	Olfm4
chr14	81930000	82530000	0
chr14	84650000	85560000	0
chr14	87630000	87990000	0
chr14	93930000	94470000	0
chr14	103540000	104460000	5	4921525B02Rik	Ednrb	Slain1	4930432J09Rik	Scel
chr14	104540000	105100000	1	D130009I18Rik
chr14	106600000	107560000	0
chr14	108990000	109690000	1	Mir3964
chr14	110750000	111220000	1	Slitrk6
chr14	112960000	114800000	0
chr14	115160000	116270000	2	4930505G20Rik	Gpc5
chr14	119120000	119970000	2	1700006F04Rik	Hs6st3
chr14	124240000	124790000	2	Fgf14	1700024B18Rik
chr15	13440000	15110000	0
chr15	15570000	16450000	0
chr15	28370000	29030000	1	Dnahc5
chr15	44960000	46950000	4	4930523O13Rik	1700022A22Rik	Kcnv1	4930548G14Rik
chr15	65890000	66380000	4	Kcnq3	Lrrc6	Hhla1	Oc90
chr15	68400000	68920000	0
chr15	69170000	72780000	6	Kcnk9	Peg13	Col22a1	Trappc9	Gm19782	Fam135b
chr15	73920000	74510000	0
chr15	83750000	84180000	5	Mpped1	Efcab6	Pnpla5	Sult4a1	Pnpla3
chr15	86520000	88630000	3	Zdhhc25	Fam19a5	B230214G05Rik
chr15	92320000	93160000	3	Mir544	Cntn1	Pdzrn4
chr16	5270000	6710000	2	Rbfox1	1700123O21Rik
chr16	7460000	8450000	1	Cldn26
chr16	9290000	10080000	1	Grin2a
chr16	12040000	13020000	2	1700003L19Rik	Shisa9
chr16	18970000	20020000	13	Hira	Olfr164	Olfr171	Olfr166	Olfr165	Olfr169	A930003A15Rik	Olfr167	B3gnt5	Olfr170	Klhl6	Olfr168	Lamp3
chr16	27710000	28800000	3	Fgf12	Mir690	Gm10823
chr16	39200000	42140000	1	Lsamp
chr16	47680000	48620000	4	Morc1	Gm5485	Dppa2	Dppa4
chr16	58760000	59420000	28	Olfr193	Olfr187	Olfr202	Olfr183	Olfr197	Olfr198	Olfr181	Olfr203	Olfr175-ps1	Olfr206	Olfr176,Olfr177	Olfr192	Olfr199	Olfr186	Olfr195	Olfr191	Olfr196	Olfr172	Olfr208	Olfr204	Olfr190	Olfr201	Gabrr3	Olfr173	Olfr178	Olfr194	Olfr180	Olfr205
chr16	61160000	62690000	0
chr16	68270000	69360000	0
chr16	84040000	84370000	0
chr16	88570000	89760000	31	Gm10228	Krtap19-3	Krtap21-1	Krtap11-1	Krtap19-5	Krtap6-1	Krtap8-1	2310061N02Rik	Krtap20-2	Gm20741	Krtap22-2	Krtap19-1	Krtap14	Krtap16-1	Krtap27-1	Krtap13-1	Krtap26-1	2310079G19Rik	Krtap6-2	Krtap13	Krtap15	2310057N15Rik	Krtap24-1	Krtap7-1	Krtap19-4	1110025L11Rik	Krtap19-9b	Krtap6-5	Krtap16-3	Gm10229	2310034C09Rik
chr17	8990000	9970000	4	6530411M01Rik	4930452A19Rik	1700010I14Rik	Pabpc6
chr17	10840000	11990000	3	Park2	D17Ertd648e	Pacrg
chr17	18150000	20420000	18	Vmn2r92	Vmn2r101	Vmn2r95	Vmn2r100	Vmn1r224	Vmn2r103	Vmn2r107	Vmn2r97	Fpr-rs6	Vmn2r102	Vmn2r105	Vmn2r104	Vmn2r93	Vmn2r94	Vmn2r99	Vmn2r106	Vmn2r98	Vmn2r96
chr17	36320000	36820000	8	H2-M10.6	H2-M9	H2-M10.3	H2-M10.4	H2-M1	H2-M10.5	H2-M10.1	H2-M11
chr17	37410000	40490000	46	Olfr112	H2-M2	Crisp3	Olfr114	Olfr129	Olfr136	Olfr118	Olfr111	Olfr113	Olfr121	Olfr130	Olfr126	Olfr125	Gm20408	Pgk2	Olfr128	Gm21946	Olfr132	Olfr116	Olfr133	Crisp1	Gm20410	Olfr120	Olfr110	Olfr122	Gm9041	Olfr124	Olfr108	Olfr127	Gm20581	Olfr135	Gm21947	Olfr115	Olfr131	Olfr761	Olfr117	Olfr109	Olfr137	Gm4345	Olfr138	Rn45s	Olfr123	Olfr119	Olfr134	Gm20516	Gm20579
chr17	48470000	49410000	3	Gm17830	1700008K24Rik	Lrfn2
chr17	51300000	52350000	5	C330011F03Rik	Mir669a-1,Mir669a-11,Mir669p-1	Satb1	Gm20098	Tbc1d5
chr17	52930000	53240000	1	Kcnh8
chr17	53700000	55540000	6	4932415M13Rik	Sult1c2	Slc5a7	1700025K24Rik	Sult1c1	St6gal2
chr17	57350000	58580000	3	Vmn2r120	Cntnap5c	Emr1
chr17	68270000	68800000	1	L3mbtl4
chr17	69440000	70360000	1	A330050F15Rik
chr17	73310000	73650000	2	Capn13	Galnt14
chr17	88650000	89220000	3	Gtf2a1l	Lhcgr	Fshr
chr17	89620000	90360000	2	4930480K15Rik	Nrxn1
chr17	93460000	94690000	0
chr18	19230000	19940000	0
chr18	25660000	26080000	1	Celf4
chr18	26620000	27140000	0
chr18	27500000	30250000	3	4930474G06Rik	4930527G23Rik	4930578E11Rik
chr18	45480000	46110000	2	Kcnn2	A330093E20Rik
chr18	59430000	60110000	0
chr18	72210000	73490000	1	Dcc
chr18	76550000	76810000	0
chr18	80980000	82170000	2	Mir5127	Sall3
chr18	83300000	83740000	1	4921531P14Rik
chr18	84960000	86940000	4	Fbxo15	Cbln2	Timm21	Neto1
chr18	90010000	90390000	0
chr19	7630000	8500000	7	Slc22a27	Hrasls5	Slc22a19	Slc22a29	Slc22a28	Slc22a30	Slc22a26
chr19	9140000	9790000	1	Stxbp3b
chr19	13600000	14420000	14	Olfr1490	Olfr1495	Olfr1494	Olfr1504	Olfr1496	Olfr1502	Olfr1489	Olfr1499	Olfr1501	Olfr1491	Olfr1487	Olfr1505	Olfr1500	Olfr1497
chr19	14690000	15340000	0
chr19	17410000	18050000	1	Pcsk5
chr19	19230000	20210000	0
chr19	25480000	26560000	4	Dmrt1	Dmrt3	Dmrt2	2610016A17Rik
chr19	39000000	40070000	13	Cyp2c66	Cyp2c67	Cyp2c40	Cyp2c69	Cyp2c53-ps	Cyp2c38	Cyp2c37	Cyp2c29	Cyp2c65	Cyp2c55	Cyp2c39	Cyp2c54	Cyp2c68
chr19	47950000	48540000	2	Sorcs3	Ccdc147
chrX	3190000	3550000	1	Gm14345
chrX	3930000	4200000	3	Gm14347	Gm3706	Gm14346
chrX	4260000	4680000	3	Gm5925	Gm10922	Gm10921
chrX	5080000	6210000	5	Gm14374	Nudt11	Nudt10	Mycs	AU022751
chrX	8260000	9130000	19	Gm5634	Fthl17	Ssxb10	Ssxb5	Ssxb1	Ssxb6	Gm5635	Slc38a5	Ssxb8	Ssx9	Gm14459	Gm14511	4930402K13Rik	B630019K06Rik	Gm6592	Gm14458	Ssxb9	Ssxb3	Ssxb2
chrX	14220000	15600000	1	Ppp1r2-ps9
chrX	23860000	24820000	4	Gm5935	Gm4297	Gm4907	Gm5934
chrX	25280000	27050000	8	Gm6121	Gm1993	Gm14525	Slx	Gm5168	Gm5169	Gm2030	Gm2012
chrX	27210000	27470000	0
chrX	27640000	28330000	2	Gm10230,Gm10486	Gm10486,Gm14632
chrX	28390000	29150000	2	Gm10486,Gm14819	Gm10486,Gm14819
chrX	29370000	30420000	2	Gm10486,Gm14819	Gm10486,Gm14632
chrX	30550000	31010000	1	Gm10486,Gm14632
chrX	31110000	31410000	2	Gm10921	Gm10921
chrX	31920000	32250000	1	Gm14354
chrX	32430000	32760000	3	Gm21637	Gmcl1l	Gm21951
chrX	33190000	34020000	3	Gm2933	Gm2863	Gm2913
chrX	34870000	35800000	2	Gm10486,Gm14632	Gm10486,Gm14632
chrX	39770000	40140000	1	Cypt14
chrX	43940000	45090000	2	Dcaf12l1	Dcaf12l2
chrX	45860000	46610000	2	4930515L19Rik	Actrt1
chrX	49600000	50490000	6	Olfr1324	Olfr1321	Olfr1322	Olfr1323	Olfr1320	Igsf1
chrX	54240000	54820000	2	Gm16405	Gm16430
chrX	55170000	56050000	3	Gm16404	Slxl1	Gm14625
chrX	57430000	58960000	4	Zic3	Gpr101	Gm364	4930550L24Rik
chrX	60750000	61380000	4	Sox3	C030023E24Rik	Cdr1	C230004F18Rik
chrX	63470000	65520000	4	Ctag2	Gm6760	3830417A13Rik	Slitrk4
chrX	66660000	67480000	19	Mir883b	Mir465b-1	Mir741	Slitrk2	Mir465b-1	Mir465c-1	Mir742	Mir880	Mir463	Mir465c-1	Mir470	Mir465	Mir881	Mir871	Mir743	Mir471	Mir883a	Mir743b	Mir878
chrX	76180000	77290000	5	4930468A15Rik	Mir421	Mir669m-2	Gm4937	4930428D18Rik
chrX	77750000	78310000	7	Gm14743	Obp1a	Prkx	Pbsn	Gm5938	Gm14744	5430402E10Rik
chrX	81110000	82460000	1	4930595M18Rik
chrX	88350000	89230000	1	Mir1906-1
chrX	89880000	90340000	1	4930415L06Rik
chrX	90940000	92230000	9	Mageb1	Mageb1	Gm5072	Mageb5	Gm5072	Gm5941	Mageb18	Gm5071	Gm14781
chrX	96390000	97210000	3	Heph	Pgr15l	Gpr165
chrX	107920000	108720000	1	Gm732
chrX	109300000	110630000	1	Gm7134
chrX	115180000	116700000	1	Cpxcr1
chrX	117120000	119400000	2	Tgif2lx2	Tgif2lx2
chrX	120900000	122890000	2	Pcdh11x	Nap1l3
chrX	126310000	126680000	0
chrX	126920000	129510000	3	4921511C20Rik	4930558G05Rik	Gm382
chrX	137180000	137650000	2	Il1rapl2	Tex13a
chrX	147560000	150400000	11	Gm15085,Gm15093	Gm15085,Gm15093	Gm15085,Gm15093,Gm15107,Gm15114,Ott	Luzp4	Gm15104	Gm15127	Gm15085	Gm10439	Gm15091,Gm15097,Gm15127	Tmem29	Gm15085,Gm15093
chrX	153900000	155130000	16	4930524N10Rik	1700042B14Rik	Gm16390	Magea2	Magea6	Magea5	Gm10057	Magea8	Samt4	Samt2	Gm15140	Magea1	Gm10057	Magea3	Gm16445	Gm10057
chrX	158420000	158920000	0
chrX	161110000	161840000	3	Rai2	Scml2	Nhs
chrX	165340000	166140000	0
chrX	167410000	168910000	4	Frmpd4	Arhgap6	Msl3	Amelx
[truncated: 173 more columns]

## Sheet: Table S2. GO  terms
Supplemental Table 2. GO terms enriched for genes localized in PADs.
GO Term	Description	P-value	FDR q-value
GO:0050877	neurological system process	0	0
GO:0007186	G-protein coupled receptor signaling pathway	0	0
GO:0007608	sensory perception of smell	0	0
GO:0007606	sensory perception of chemical stimulus	0	0
GO:0007600	sensory perception	0	0
GO:0003008	system process	4.84e-282	1.1e-278
GO:0032501	multicellular organismal process	7.69e-125	1.49e-121
GO:0050907	detection of chemical stimulus involved in sensory perception	1.95e-118	3.31e-115
GO:0009593	detection of chemical stimulus	9.57e-113	1.45e-109
GO:0007165	signal transduction	4.19e-109	5.69e-106
GO:0050906	detection of stimulus involved in sensory perception	5.91e-102	7.3e-99
GO:0051606	detection of stimulus	1.73e-86	1.96e-83
GO:0019236	response to pheromone	1.09e-19	1.14e-16
GO:0019373	epoxygenase P450 pathway	5.84e-12	5.67e-09
GO:0050911	detection of chemical stimulus involved in sensory perception of smell	1.33e-11	1.2e-07
GO:0019369	arachidonic acid metabolic process	8.98e-08	7.62e-05
GO:0042742	defense response to bacterium	1.36e-05	0.0109
GO:0006690	icosanoid metabolic process	2.8e-05	0.0211
GO:1901568	fatty acid derivative metabolic process	2.8e-05	0.02
GO:0009617	response to bacterium	5.13e-05	0.0348
GO:0050794	regulation of cellular process	5.89e-05	0.0381
GO:0033559	unsaturated fatty acid metabolic process	6.27e-05	0.0387
GO:0001676	long-chain fatty acid metabolic process	0.000126	0.0742

## Sheet: Table S3. Repeat enrichment
Supplementary Table 3. H3, H3.3-Flag, H3K9me3 and H3K27me3 enrichment in repeats (log(maximum likelihood estimate (MLE) fold enrichment in ChIP vs. Input).
ID	Class	Family	WT PML	Pml ko H3	WT H3	Pml ko H3.3	WT H3.3	Pml ko H3K9me3	WT H3K9me3	Pml ko H3K27me3	WT H3K27me3
(CAAAG)n	LTR	ERVK	1.775	4.197	2.791	2.652	2.181	3.502	-0.007	0.098	0.032
(A)n	LTR	ERV1	3.891	2.081	4.169	0.33	2.181	2.971	3.452	1.683	2.354
(CAAAA)n	Simple_repeat	Simple_repeat	1.775	1.875	2.671	0.33	1.444	2.003	0.841	0.583	2.92
(GGGGA)n	LTR	ERVK	0.267	1.031	1.367	-0.331	-0.438	1.797	1.75	1.121	1.286
(CACCT)n	Simple_repeat	Simple_repeat	0.563	1.032	1.284	-0.238	-0.332	1.759	0.918	1.483	1.391
(CAGTC)n	LTR	ERVK	0.42	1.035	1.223	-0.075	-0.37	1.689	1.859	1.413	1.185
RLTR20D	Simple_repeat	Simple_repeat	-0.099	1.285	2.295	0.571	-0.793	1.627	0.44	2.747	3.08
(CCCTAA)n	LTR	ERVK	0.36	0.643	0.937	-0.565	-0.616	1.583	1.692	0.99	0.471
(CG)n	LTR	ERVK	0.34	1.042	1.395	-0.303	-0.541	1.578	1.354	1.211	1.168
LTR16B1	LTR	ERV1	0.133	0.613	0.696	0.427	0.604	1.558	1.323	0.858	0.772
(CGAA)n	LTR	ERVK	0.336	0.939	1.267	-0.361	-0.578	1.506	1.291	1.195	1.216
(CAAA)n	LTR	ERV1	1.847	-0.034	-0.91	0.717	1.585	1.458	0.816	-1.281	-0.499
(CTAA)n	LTR	ERVK	0.297	0.968	1.262	-0.289	-0.457	1.449	1.265	1.169	1.198
BC1_Mm	LTR	ERV1	0.217	0.77	0.704	0.089	-0.145	1.421	1.236	1.537	1.374
MER34B-int	LTR	ERV1	0.045	0.564	0.651	0.162	0.331	1.399	1.25	0.709	0.836
(CTATA)n	LTR	ERVK	0.287	0.978	1.134	-0.293	-0.502	1.388	1.108	0.895	0.941
(CATCG)n	LTR	ERVK	0.391	1.096	1.422	-0.225	-0.494	1.368	1.137	1.066	1.027
(CATA)n	LTR	ERVK	0.407	1.112	1.302	-0.194	-0.537	1.365	1.226	1.373	1.298
Charlie24	LTR	ERVK	0.194	0.383	0.488	-0.015	-0.237	1.364	1.164	0.756	0.503
AmnSINE2	LTR	ERVK	0.237	0.736	0.885	-0.316	-0.633	1.356	1.259	1.111	1.179
(CTAGG)n	LTR	ERVK	0.288	1.156	1.46	-0.324	-0.591	1.355	1.243	0.787	0.912
(CATGC)n	LTR	ERVK	0.385	1.098	1.452	-0.263	-0.624	1.347	1.351	0.874	0.722
(GAAAA)n	LTR	ERV1	0.278	0.745	0.936	-0.321	-0.626	1.329	1.356	1.02	0.697
FLAM_A	LTR	ERV1	0.167	0.433	0.579	-0.1	-0.066	1.321	1.303	1.075	0.784
UCON25	tRNA	tRNA	-0.864	-0.011	1.329	-0.177	0.462	1.313	0.966	1.786	1.16
B4A	LTR	ERV1	0.219	0.411	0.599	0.013	-0.093	1.309	0.995	1.641	1.584
(CCGAG)n	LTR	ERVK	0.355	0.969	1.39	-0.223	-0.39	1.305	1.135	0.677	0.695
(TA)n	LTR	ERVK	0.265	0.928	1.149	-0.15	-0.515	1.302	1.247	0.844	0.822
(TGGGGG)n	LTR	ERVK	0.247	1.048	1.233	-0.172	-0.375	1.288	1.089	0.829	0.909
(CGAGG)n	LTR	ERVK	0.321	0.828	1.008	-0.281	-0.598	1.262	1.204	1.312	1.219
Charlie22a	LTR	ERVK	0.195	1.071	1.246	-0.488	-0.738	1.245	1.046	0.933	0.951
ERVB5_1-LTR_MM	LTR	ERV1	0.185	0.711	0.79	-0.123	-0.567	1.223	1.218	0.849	0.858
(CGTAG)n	LTR	ERVK	0.298	0.908	1.195	-0.334	-0.594	1.208	1.063	0.888	0.851
(TAG)n	LTR	ERVK	0.257	1.032	1.296	-0.289	-0.591	1.206	0.957	1.064	1.068
Charlie12	LTR	ERVK	0.202	0.523	0.657	-0.297	-0.535	1.198	1.313	0.55	0.58
(TGG)n	LTR	ERVK	0.25	0.485	0.658	-0.254	-0.565	1.184	1.178	0.784	0.544
(CCCCAG)n	LTR	ERVK	0.372	1.019	1.185	-0.114	-0.415	1.183	1.002	1.096	1.114
Charlie4z	Simple_repeat	Simple_repeat	0.19	-0.241	1.606	-0.407	-0.878	1.18	0.841	-2.224	0.517
MMSAT4	Satellite	Satellite	-0.032	-0.034	-0.005	-0.876	-0.741	1.164	1.219	-2.264	-2.352
AmnSINE1	LTR	ERV1	0.238	0.611	0.758	-0.249	-0.384	1.161	0.933	1.611	1.609
(CAGG)n	Simple_repeat	Simple_repeat	0.441	0.749	1.717	-0.552	-0.166	1.157	1.779	-0.08	0.423
Helitron2Na_Mam	LTR	ERV1	0.16	0.47	0.585	-0.221	-0.418	1.157	0.982	0.879	0.732
(CGAAT)n	LTR	ERVK	0.328	0.829	0.939	-0.282	-0.543	1.13	1.058	1.419	1.241
(TAAA)n	LTR	ERVK	0.264	0.713	0.842	-0.167	-0.398	1.127	0.909	0.847	0.921
(CATTT)n	Simple_repeat	Simple_repeat	0.379	1.41	1.612	0.737	0.161	1.116	0.906	2.171	2.137
(CAAGT)n	Simple_repeat	Simple_repeat	0.746	0.553	0.348	0.495	0.6	1.11	0.988	1.013	0.601
Charlie9	LTR	ERVK	0.19	0.772	1.079	-0.011	-1.219	1.108	0.603	0.605	-0.515
(CTAAA)n	LTR	ERVK	0.297	1.149	1.36	-0.236	-0.521	1.101	0.931	1.119	1.072
(CATCT)n	LTR	ERVK	0.387	0.841	1.023	-0.154	-0.389	1.093	1.304	1.515	1.327
HY1	LTR	ERV1	0.159	0.419	0.446	-0.149	-0.411	1.083	0.919	1.519	1.246
Charlie13a	LTR	ERVK	0.202	0.882	1.128	-0.405	-0.441	1.078	1.272	0.687	1.046
(GA)n	LTR	ERVK	0.281	0.757	0.878	-0.221	-0.524	1.075	0.919	0.793	0.677
(CCTAA)n	LTR	ERVK	0.348	0.838	0.962	0.008	-0.229	1.067	0.877	1.021	0.903
(CAATG)n	Simple_repeat	Simple_repeat	0.677	1.144	1.605	0.733	0.566	1.058	1.077	1.358	1.757
(CGAGT)n	LTR	ERVK	0.31	0.772	0.986	-0.256	-0.566	1.058	1.055	1.337	1.189
ORSL-2a	LTR	ERVK	-0.051	1.188	1.016	1.153	-0.141	1.055	-0.007	-1.281	0.579
LTR16D	LTR	ERVK	0.132	0.801	1.007	-0.053	-0.275	1.04	0.786	0.926	0.761
B2_Mm1a	LTR	ERV1	0.224	0.603	0.792	-0.206	-0.273	1.034	0.829	1.21	1.223
(CAGAGA)n	Simple_repeat	Simple_repeat	0.48	0.134	1.823	-1.255	0.777	1.024	-0.37	1.015	1.506
LTR65	LTR	ERV1	0.105	0.57	0.747	-0.228	-0.313	1.016	0.919	1.143	1.01
(CACCC)n	Simple_repeat	Simple_repeat	0.601	1.436	1.497	0.2	0.467	1.015	0.943	1.334	1.607
(CAATC)n	Simple_repeat	Simple_repeat	0.689	1.177	0.758	0.025	-0.908	0.984	0.91	0.69	1.555
(CATTC)n	Simple_repeat	Simple_repeat	0.382	1.244	1.484	0.11	0.295	0.983	0.822	1.191	1.479
(GGAAA)n	LTR	ERVK	0.274	0.417	0.692	-0.4	-0.655	0.966	1.259	0.623	0.253
Eulor2A	LTR	ERVK	0.179	0.605	0.417	0.366	-0.259	0.956	0.672	1.441	0.43
Eulor4	Satellite	Satellite	0.178	-0.377	-0.48	-0.025	-0.037	0.955	1.54	-0.222	-0.611
(CGGT)n	LTR	ERVK	0.3	0.959	1.198	-0.087	-0.367	0.952	0.829	1.098	1.093
MER91A	LTR	ERVK	0.005	0.953	0.601	0.403	-0.101	0.935	0.39	1.458	0.389
(CTTTA)n	LTR	ERVK	0.284	0.798	1.002	-0.268	-0.621	0.926	0.805	1.082	0.933
UCON4	Simple_repeat	Simple_repeat	-1.09	0.316	0.774	0.491	0.416	0.923	-0.925	-0.82	1.302
(GAGAA)n	LTR	ERVL-MaLR	0.277	0.619	0.748	-0.178	-0.433	0.92	0.877	0.706	0.84
B1F1	LTR	ERVK	0.225	0.96	1.127	-0.282	-0.617	0.916	0.77	0.694	0.708
LTR33C	LTR	ERVK	0.116	0.905	1.193	-0.388	-0.594	0.904	0.945	1.09	1.166
(CCCCG)n	Simple_repeat	Simple_repeat	0.369	1.138	1.343	0.157	0.214	0.903	0.935	0.175	0.519
(CAGGC)n	LTR	ERVK	0.437	0.794	0.963	-0.081	-0.311	0.871	0.707	1.001	1.161
LTR16E2	LTR	ERV1	0.125	0.32	0.518	-0.169	-0.283	0.868	0.765	1.022	0.84
Charlie10	LTR	ERV1	0.208	0.512	0.689	-0.164	-0.186	0.858	0.891	0.763	0.338
(CATG)n	LTR	ERVK	0.387	0.822	0.992	-0.299	-0.621	0.841	0.828	0.855	0.773
(CCCCAA)n	LTR	LTR	0.372	0.805	0.908	-0.264	-0.563	0.839	0.721	1.076	0.804
(CGAAG)n	LTR	ERVK	0.33	0.707	0.98	-0.187	-0.448	0.839	0.823	1.319	1.167
(CATAA)n	LTR	ERVK	0.402	0.789	0.947	-0.251	-0.534	0.832	0.753	1.063	0.901
(CCGCG)n	LTR	ERVK	0.353	0.743	0.956	-0.241	-0.318	0.827	0.679	0.956	1.122
B1F2	LTR	ERV1	0.225	0.524	0.671	-0.248	-0.486	0.819	0.788	0.78	0.946
(CGAAA)n	LTR	ERVK	0.336	0.832	1.033	-0.274	-0.605	0.779	0.675	0.881	0.866
(GAA)n	LTR	ERV1	0.28	0.671	0.872	0.02	0.331	0.778	-0.007	0.872	0.806
RLTR31A_Mm	Simple_repeat	Simple_repeat	-0.115	1.058	1.362	0.025	-0.445	0.766	1.483	1.772	2.179
(CACAC)n	Unknown	Unknown	0.668	0.552	0.727	0.212	-0.455	0.758	0.429	0.765	0.929
RMER3D1	LTR	ERV1	-0.197	0.801	0.629	0.491	0.02	0.758	0.429	1.565	2.248
MamRep488	LTR	ERV1	0.078	0.558	0.601	-0.146	-0.256	0.754	0.803	0.665	0.579
(CAACC)n	LTR	ERVK	1.038	-0.241	0.954	1.067	0.2	0.752	0.944	0.835	2.354
(CATAC)n	LTR	ERVK	0.402	0.624	0.85	-0.268	-0.508	0.734	0.76	0.753	0.695
(CGGG)n	Simple_repeat	Simple_repeat	0.301	1.388	0.889	0.96	0.946	0.731	0.517	0.286	0.716
CYRA11_Mm	tRNA	tRNA	0.19	-0.21	0.469	1.157	1.055	0.73	0.653	1.121	-0.064
(TTAA)n	LTR	ERV1	0.247	0.535	0.679	-0.106	-0.325	0.727	0.649	0.836	1.056
(TATAA)n	Simple_repeat	Simple_repeat	0.254	1.053	1.285	0.312	0.29	0.72	0.531	1.644	1.951
(TAAAA)n	LTR	ERVL-MaLR	0.263	0.467	0.623	-0.036	-0.123	0.71	0.667	1.015	1.121
(CTAAG)n	LTR	ERVK	0.296	0.549	0.684	-0.231	-0.399	0.704	0.641	1.14	1.128
B2_Mm1t	LTR	ERVL-MaLR	0.223	0.53	0.629	-0.145	-0.407	0.703	0.658	0.602	0.768
MER130	LTR	ERV1	0.057	0.479	1.138	-0.636	-0.727	0.703	0.971	0.584	0.683
(GGA)n	LTR	ERVK	0.276	0.124	0.773	-0.663	-0.746	0.702	1.333	0.144	0.015
MER33	Simple_repeat	Simple_repeat	0.046	1.313	1.206	-0.362	-0.141	0.694	-0.312	0.46	0.594
(CGGA)n	LTR	ERVK	0.307	0.882	1.107	-0.348	-0.632	0.689	0.549	0.779	0.827
(CGGAA)n	LTR	ERVK	0.307	0.86	1.064	-0.315	-0.605	0.675	0.571	0.822	0.891
Cheshire_Mars	tRNA	tRNA	0.19	1.694	-0.811	0.491	1.444	0.668	0.66	3.268	3.183
IAPEY_LTR	LTR	ERVK	0.156	0.339	0.431	-0.042	-0.064	0.667	0.658	1.17	1.315
BGLII_A	LTR	ERV1	0.216	0.435	0.535	-0.234	-0.519	0.66	0.612	0.842	0.794
Charlie20a	LTR	ERVL-MaLR	0.195	0.389	0.575	-0.279	-0.422	0.66	0.544	0.743	0.909
(TTAAG)n	LTR	ERVK	0.243	0.124	0.238	-0.315	-0.34	0.655	0.639	1.036	0.997
(CTATT)n	LTR	ERVK	0.286	0.734	0.931	-0.309	-0.49	0.654	0.494	0.865	0.874
Eulor6E	Satellite	Satellite	0.17	1.019	0.912	0.201	0.156	0.654	0.112	0.869	0.954
(CCCGA)n	Simple_repeat	Simple_repeat	0.366	0.769	0.506	0.438	0.669	0.653	-0.084	0.171	0.82
Tigger8	LTR	ERV1	-0.257	0.837	0.262	-0.117	0.907	0.649	-0.744	0.715	0.213
Charlie1a	LTR	ERVL-MaLR	0.197	0.551	0.571	-0.16	-0.367	0.646	0.575	0.757	0.821
(GAAA)n	LTR	ERVK	0.278	0.781	0.968	-0.164	-0.467	0.644	0.445	0.824	0.718
(TAAAAA)n	LTR	ERVK	0.262	0.079	0.186	-0.343	-0.518	0.642	0.793	1.128	0.702
(CAAGA)n	Simple_repeat	Simple_repeat	0.77	1.284	1.365	0.373	0.41	0.632	0.175	0.459	0.749
(CTAG)n	LTR	ERVK	0.289	0.376	0.474	-0.329	-0.544	0.632	0.637	1.006	1.019
(CCGAA)n	LTR	ERV1	0.355	0.087	0.091	-0.27	-0.521	0.628	0.891	1.354	1.053
IAPEY2_LTR	LTR	ERVK	0.155	0.124	0.212	-0.029	-0.005	0.62	0.717	0.978	1.057
CENSAT_MC	LTR	ERVL-MaLR	0.212	0.39	0.51	0.014	-0.061	0.605	0.607	0.968	1.031
MER97d	Simple_repeat	Simple_repeat	-0.001	0.549	1.144	0.097	-0.177	0.605	0.463	0.838	0.886
RLTR22_Mur	tRNA	tRNA	-0.099	0.207	0.554	1.168	1.583	0.59	-0.297	1.822	1.495
5S	LTR	ERVK	0.241	0.616	0.809	-0.062	-0.3	0.589	0.463	0.71	1.019
Arthur1C	LTR	ERVK	0.235	0.519	0.635	-0.191	-0.489	0.573	0.541	0.967	0.99
Eulor1	LTR	ERV1	0.181	0.498	0.658	-0.317	-0.148	0.561	0.614	0.83	0.668
BGLII_B	LTR	ERVL-MaLR	0.216	0.449	0.507	-0.108	-0.264	0.558	0.548	0.753	0.963
ID2	LTR	ERVK	0.148	0.36	0.448	0.041	0.031	0.547	0.457	0.972	1.185
MER2B	Unknown	Unknown	0.05	-0.635	-0.779	-0.213	-0.331	0.544	1.174	-0.724	-1.533
B1_Mur2	LTR	ERVL-MaLR	0.231	0.333	0.381	-0.207	-0.459	0.539	0.535	0.416	0.492
LTR16D1	LTR	ERV1	0.131	0.376	0.699	-0.485	-0.443	0.539	0.914	0.2	0.776
Charlie6	Simple_repeat	Simple_repeat	0.19	1.233	1.691	1.067	2.522	0.538	-0.007	-1.487	-1.553
MLT1H1	Simple_repeat	Simple_repeat	-0.016	0.049	0.262	0.671	0.345	0.538	0.944	0.715	1.551
Charlie15a	LTR	ERVL-MaLR	0.201	0.418	0.448	-0.068	-0.243	0.532	0.501	0.699	0.847
(CGA)n	Unknown	Unknown	0.34	0.781	0.774	0.305	0.395	0.53	0.452	0.37	0.691
(GGAA)n	LTR	ERVK	0.275	0.668	0.757	-0.187	-0.462	0.526	0.322	0.689	0.797
(TAGGG)n	Simple_repeat	Simple_repeat	0.255	1.23	1.098	0.066	0.044	0.526	0.398	0.703	0.997
FAM	LTR	ERVL-MaLR	0.167	0.419	0.508	0.051	0.037	0.526	0.478	0.851	1.053
LTR16E1	Simple_repeat	Simple_repeat	0.128	0.466	0.239	-0.567	0.388	0.526	0.603	0.561	0.978
(TGGA)n	LTR	ERVK	0.248	0.247	0.274	-0.274	-0.472	0.522	0.58	0.986	0.866
(CATGT)n	Simple_repeat	Simple_repeat	0.384	0.999	0.987	-0.189	-0.271	0.509	0.341	0.345	1.118
IAPLTR2_Mm	LTR	ERVK	0.153	0.076	0.041	-0.235	-0.404	0.508	0.727	0.759	0.336
Eulor5A	LTR	ERVL-MaLR	0.178	0.348	0.386	-0.073	-0.231	0.499	0.481	0.651	0.768
MER74C	tRNA	tRNA	0.012	0.578	0.088	0.371	1.117	0.487	-0.69	0.012	0.032
UCON31	Simple_repeat	Simple_repeat	-1.064	0.066	-0.093	-0.101	0.331	0.462	0.083	0.758	0.632
(TTAGGC)n	LTR	ERVL-MaLR	0.242	0.298	0.361	-0.291	-0.511	0.461	0.499	0.632	0.377
B2_Mm2	Other	Other	0.223	0.783	0.932	-0.139	-0.3	0.46	0.181	0.319	0.555
(CAGGT)n	Simple_repeat	Simple_repeat	0.434	0.366	0.589	-0.002	-0.288	0.455	0.596	0.315	0.734
tRNA-Gln-CAG	Simple_repeat	Simple_repeat	-0.295	-0.726	-2.338	0.693	0.959	0.453	-1.23	0.75	0.032
RMER20B	Simple_repeat	Simple_repeat	-0.192	0.798	0.838	0.385	-0.141	0.446	-0.094	0.895	0.797
(GGAGA)n	Simple_repeat	Simple_repeat	0.273	-0.434	0.525	0.081	-0.141	0.438	0.534	0.955	1.238
(G)n	Simple_repeat	Simple_repeat	0.283	0.704	0.952	0.143	-0.033	0.436	0.214	0.803	1.343
(CCCTAG)n	Simple_repeat	Simple_repeat	0.358	0.766	0.898	-0.349	-0.255	0.435	0.317	0.842	1.186
Eulor6B	LTR	ERVK	0.175	0.47	0.641	0.033	-0.094	0.435	0.359	0.489	0.511
RLTR20C	Simple_repeat	Simple_repeat	-0.099	0.496	0.282	-0.807	0.487	0.429	0.971	0.098	0.117
(CGAGA)n	Simple_repeat	Simple_repeat	0.324	0.764	1.019	-0.231	-0.01	0.428	0.571	0.282	0.628
(CAAT)n	LTR	ERVK	0.709	0.572	0.686	-0.487	-0.595	0.425	-0.573	-1.652	-0.654
(CGATA)n	LTR	ERVK	0.309	0.446	0.663	-0.093	-0.434	0.415	0.451	0.767	0.65
Kanga1d	LTR	ERV1	0.14	0.556	0.701	-0.051	-0.095	0.415	0.273	0.845	0.937
IAPLTR2a	tRNA	tRNA	0.153	0.163	0.724	0.472	0.589	0.414	-0.144	0.936	0.999
HAL1	LTR	ERV1	0.165	0.563	0.587	-0.017	-0.155	0.413	0.193	0.912	1.101
MamSINE1	Simple_repeat	Simple_repeat	0.076	0.92	1.047	0.027	0.027	0.407	0.02	0.739	1.153
Eulor8	LTR	ERVL	0.169	0.187	0.291	-0.28	-0.423	0.4	0.574	1.001	1.03
FordPrefect_a	LTR	ERVL-MaLR	0.166	0.337	0.347	-0.067	-0.219	0.4	0.39	0.555	0.656
Arthur1A	LTR	ERVK	0.236	0.102	0.194	-0.219	-0.383	0.399	0.594	0.761	0.487
Eulor3	Simple_repeat	Simple_repeat	0.178	0.93	1.232	0.305	0.27	0.399	0.089	0.236	0.846
ERVB4_2-LTR_MM	Other	Other	0.188	0.674	0.835	-0.091	-0.185	0.396	0.15	0.299	0.479
LSU-rRNA_Hsa	LTR	ERVL-MaLR	0.135	0.227	0.269	-0.018	-0.09	0.391	0.415	0.508	0.614
LTR45C	LTR	ERVL-MaLR	0.108	0.201	0.211	-0.076	-0.19	0.391	0.438	0.654	0.724
(TGAA)n	LTR	ERVK	0.253	0.545	0.653	-0.095	-0.272	0.388	0.266	0.842	1.007
(CCTAT)n	Simple_repeat	Simple_repeat	0.342	0.673	0.655	0.07	-0.251	0.386	0.16	1.048	1.259
Charlie13b	Simple_repeat	Simple_repeat	0.201	0.619	0.733	-0.128	-0.108	0.384	0.757	1.374	1.79
(CACCAT)n	Simple_repeat	Simple_repeat	0.608	1.114	1.132	0.257	1.132	0.383	0.488	-0.014	0.886
IAPLTR3	LTR	ERVK	0.15	-0.108	-0.132	0.095	0.222	0.383	0.693	0.178	-0.102
LTR58	LTR	ERVK	0.107	-0.049	-0.026	-0.064	-0.032	0.369	0.666	0.419	0.293
Kanga2_a	Unknown	Unknown	0.14	0.04	0.609	0.062	0.167	0.362	0.26	1.134	0.657
7SK	LTR	ERVK	0.24	0.345	0.39	0.057	-0.291	0.359	0.319	1.16	0.815
(CACTT)n	Simple_repeat	Simple_repeat	0.51	0.515	0.905	0.272	0.309	0.358	0.357	0.857	1.008
Kanga1	LTR	ERVK	0.146	0.254	0.411	-0.264	-0.53	0.357	0.245	0.81	1.006
YREP_Mm	Simple_repeat	Simple_repeat	-1.925	0.255	0.228	0.717	-0.382	0.349	0.936	-0.795	-0.861
Zaphod	Simple_repeat	Simple_repeat	-1.925	1.044	-0.91	-1.048	-0.382	0.349	-2.123	0.485	-0.209
HY4	LTR	ERVL-MaLR	0.157	0.343	0.402	-0.067	-0.175	0.339	0.296	0.661	0.623
ID_B1	LTR	ERVK	0.149	-0.065	-0.023	0.14	0.217	0.339	0.563	0.378	0.122
(CAAAC)n	DNA	MULE-MuDR	1.775	-0.352	-0.379	-0.032	0.149	0.332	1.215	0.387	0.563
LTR41	LTR	ERVL-MaLR	0.11	0.297	0.338	0.004	-0.045	0.327	0.302	0.68	0.782
B4	Simple_repeat	Simple_repeat	0.219	0.384	0.651	0.203	0.318	0.323	0.195	0.772	0.934
LTR82A	LTR	ERVK	0.1	-0.182	-0.166	0.113	0.087	0.319	0.595	0.267	-0.07
Charlie21a	LTR	ERVK	0.195	0.439	0.564	-0.191	-0.349	0.318	0.225	0.666	0.874
(CGGAG)n	DNA	hAT-Tip100	0.305	0.506	0.469	0.034	-0.207	0.315	0.15	0.919	0.983
LTRIS3	LTR	ERVL	0.085	0.277	0.44	0.111	0.166	0.315	0.264	0.696	0.967
MER44C	LTR	ERV1	0.042	-0.142	0.241	-0.504	-0.006	0.31	0.434	0.274	0.008
LTR48B	LTR	ERVK	0.108	-0.067	0.006	-0.309	-0.59	0.303	0.432	0.669	-0.08
IAPLTR2b	LTR	ERVL-MaLR	0.151	0.255	0.347	-0.153	-0.246	0.297	0.247	0.632	0.66
Charlie10a	LTR	ERVK	0.206	-0.172	-0.228	-0.257	-0.438	0.296	0.41	0.53	-0.085
ERVB7_1-LTR_MM	LTR	ERVL	0.181	0.49	0.571	0.085	-0.058	0.288	0.102	0.85	0.969
(CACAA)n	Simple_repeat	Simple_repeat	0.676	1.344	0.954	0.33	0.345	0.287	-2.329	0.946	-0.705
MER5B	SINE	Alu	0.023	0.443	0.508	-0.018	-0.034	0.287	0.218	0.373	0.32
RLTR10C	tRNA	tRNA	-0.061	0.245	-1.005	0.972	1.902	0.287	-0.259	-0.846	-0.911
LTR33A_	LTR	ERVL-MaLR	0.12	0.15	0.155	0.069	0.055	0.286	0.356	0.448	0.521
(CAATA)n	Unknown	Unknown	0.699	0.221	0.236	0.238	0.545	0.284	0.096	0.298	0.673
Charlie10b	LTR	ERVK	0.206	0.443	0.651	-0.195	-0.397	0.284	0.244	0.581	0.692
Kanga1a	LTR	ERVK	0.144	0.506	0.642	-0.121	-0.348	0.284	0.147	0.569	0.707
(TAAG)n	Simple_repeat	Simple_repeat	0.259	0.421	0.667	-0.031	0.092	0.278	0.372	0.86	1.244
LTR41B	Simple_repeat	Simple_repeat	0.109	0.927	1.069	-0.267	-0.236	0.278	0.158	0.382	0.518
MLT1F2	Simple_repeat	Simple_repeat	-0.012	0.331	0.386	0.388	0.29	0.271	0.009	0.399	0.462
Arthur1	LTR	ERVK	0.237	0.372	0.52	-0.119	-0.37	0.269	0.221	0.554	0.614
ERVB5_2-LTR_MM	LTR	ERV1	0.183	0.367	0.45	-0.234	-0.368	0.268	0.241	0.568	0.72
LTR37A	LTR	ERVL-MaLR	0.114	0.27	0.32	-0.027	-0.115	0.265	0.232	0.619	0.69
LTRIS_Mus	LTR	ERV1	0.086	0.248	0.294	0.045	0.087	0.263	0.269	0.193	0.321
Charlie8	LTR	ERVK	0.19	0.492	0.385	-0.138	-0.193	0.262	0.106	0.673	1.03
(CACGA)n	Simple_repeat	Simple_repeat	0.536	1.121	0.652	0.28	-0.046	0.258	0.45	0.785	1.247
B1_Mur4	LTR	ERVK	0.229	0.042	0.047	-0.371	-0.644	0.258	0.654	0.745	0.313
IAPLTR1a_Mm	LTR	ERVK	0.154	-0.217	-0.037	-0.156	-0.257	0.256	0.6	0.205	-0.315
(CAT)n	Simple_repeat	Simple_repeat	0.419	0.615	1.126	-0.304	-0.391	0.253	0.392	0.992	1.155
L5	LTR	ERVK	0.138	0.437	0.566	-0.069	-0.118	0.253	0.16	0.704	0.977
LTR23-int	LTR	ERVL-MaLR	0.125	0.26	0.311	0.02	-0.075	0.25	0.183	0.64	0.713
HAL1-3A_ME	LTR	ERVL-MaLR	0.162	0.107	0.118	-0.206	-0.424	0.249	0.273	0.355	0.369
tRNA-Phe-TTY	snRNA	snRNA	-0.34	0.069	0.313	-0.097	1.174	0.244	-0.769	0.485	0.301
Eulor6D	LTR	ERVK	0.17	0.519	0.578	-0.193	-0.265	0.242	0.154	0.707	0.845
Eulor10	Simple_repeat	Simple_repeat	0.179	0.632	0.662	0.086	0.044	0.238	0.007	0.359	0.628
(CAAGG)n	LTR	ERV1	0.747	-0.132	0.905	0.766	0.02	0.237	0.429	0.258	1.074
B1_Mur3	LTR	ERVL	0.23	0.405	0.442	0.017	-0.082	0.236	0.02	0.74	0.771
MamRep38	LTR	ERVL	0.079	0.345	0.402	0.066	-0.005	0.233	0.054	0.704	0.857
(CAGCG)n	Unknown	Unknown	0.443	0.374	0.49	0.472	0.607	0.231	0.154	0.24	0.212
B1_Mus2	LTR	ERVL	0.227	0.517	0.437	-0.027	-0.25	0.231	-0.151	0.821	0.663
(CAGAG)n	tRNA	tRNA	0.487	-0.241	0.697	0.873	1.807	0.227	-0.382	0.583	0.575
LTR52-int	LINE	L1	0.107	0.279	0.278	-0.146	-0.095	0.222	0.223	0.561	0.785
LTR81A	Simple_repeat	Simple_repeat	0.1	0.676	0.634	-0.1	-0.134	0.221	0.237	0.566	0.759
MER31-int	SINE	Alu	0.047	0.432	0.459	0.056	0.045	0.218	0.156	0.38	0.425
GSAT_MM	LTR	ERVK	0.165	0.476	0.549	-0.218	-0.323	0.215	0.164	0.399	0.574
Charlie19a	Other	Other	0.198	0.389	0.453	-0.264	-0.533	0.214	0.115	0.231	0.34
MER50	DNA	hAT-Tip100	0.033	0.187	0.082	0.296	0.17	0.212	-0.049	0.979	1.285
LTRIS5	LTR	ERV1	0.084	0.208	0.346	0.355	0.586	0.209	0.223	0.346	0.164
Charlie1b	LTR	ERVK	0.196	0.289	0.383	-0.25	-0.556	0.208	0.497	0.585	0.56
HAL1b	tRNA	tRNA	0.162	0.496	0.23	0.671	1.238	0.206	-0.312	0.349	0.925
LTR9	LTR	ERVK	0.088	0.029	0.085	-0.201	-0.423	0.205	0.5	0.187	0.067
AT_rich	LTR	ERVK	0.234	0.005	0.054	-0.199	-0.396	0.202	0.516	0.72	0.277
LTR16A	LTR	ERVL-MaLR	0.135	0.226	0.265	-0.005	-0.132	0.201	0.2	0.556	0.59
ERVB4_1-LTR_MM	LTR	ERVK	0.189	-0.093	-0.135	0.02	-0.012	0.2	0.429	0.315	-0.017
MER81	SINE	Alu	0.009	0.413	0.457	0.064	0.072	0.194	0.068	0.269	0.351
MER65D	DNA	hAT-Tip100	0.02	0.473	0.515	0.051	0.145	0.191	-0.067	0.903	1.167
(CATATA)n	tRNA	tRNA	0.397	0.883	-0.91	0.33	-0.671	0.188	-0.007	-0.433	0.238
LTR85b	LTR	ERVL	0.095	0.352	0.421	0.046	-0.058	0.188	-0.03	0.79	0.776
B1F	LTR	ERV1	0.227	0.111	0.527	-0.457	-0.472	0.187	0.679	0.47	0.772
LTR36	LTR	ERVK	0.115	-0.023	0.008	-0.388	-0.574	0.187	0.545	0.822	0.349
MLT1A1	Simple_repeat	Simple_repeat	-0.006	0.279	-0.031	-0.144	0.454	0.186	0.229	0.238	0.602
L4	LTR	ERVL	0.138	0.4	0.42	0.1	0.01	0.182	0.007	0.714	0.83
LTR73	LTR	ERVL	0.104	0.133	0.157	0.152	0.173	0.179	0.198	0.603	0.661
LTR44	SINE	B4	0.109	0.393	0.438	0.045	-0.072	0.178	0.01	0.487	0.58
(GGGAA)n	LTR	ERVK	0.272	-0.031	0.04	-0.233	-0.402	0.175	0.535	0.815	0.429
LTR28	SINE	B4	0.123	0.408	0.457	0.064	-0.054	0.173	0.002	0.439	0.557
LTR69	Simple_repeat	Simple_repeat	0.104	0.18	0.111	-0.266	-0.225	0.17	0.336	0.509	0.738
MLT1B	Unknown	Unknown	-0.006	0.32	0.595	0.223	0.057	0.169	0.027	0.641	0.386
LTR33	LTR	ERVL-MaLR	0.121	0.231	0.27	-0.003	-0.097	0.166	0.115	0.625	0.689
LTR86C	scRNA	scRNA	0.091	0.371	0.423	0.106	0.16	0.163	0.026	0.304	0.428
MER91C	Simple_repeat	Simple_repeat	0.004	0.708	1.129	-0.175	-0.017	0.163	0.211	0.424	0.873
B1_Mur1	LTR	ERVK	0.233	0.577	0.649	-0.098	-0.279	0.161	0.105	0.599	0.761
RLTR10A	LTR	ERVK	-0.06	-0.032	-0.043	0.284	0.445	0.16	0.167	0.381	0.331
B3	LTR	ERVL	0.222	0.404	0.397	0.228	0.14	0.154	0.101	0.454	0.787
Charlie25	LTR	ERVL	0.192	0.305	0.543	0.069	-0.01	0.154	0.039	0.813	0.77
MER95	LTR	ERVL?	0.002	0.194	0.04	0.054	-0.286	0.153	-0.153	0.645	0.376
RNLTR23	tRNA	tRNA	-0.218	0.646	-0.295	0.48	0.829	0.151	0.07	2.33	0.182
LTR40a	LTR	ERVK	0.113	-0.102	-0.097	0.162	0.248	0.147	0.351	0.27	0.259
LTR33B	LTR	ERVL-MaLR	0.119	0.166	0.197	-0.039	-0.101	0.146	0.128	0.532	0.582
IAPLTR4_I	LTR	ERVL	0.149	0.447	0.504	-0.003	-0.122	0.145	0.017	0.634	0.847
MamRep1161	LTR	ERVK	0.081	0.011	0.018	-0.097	-0.137	0.145	0.407	0.173	0.123
LTR75_1	LTR	ERVL-MaLR	0.103	0.075	0.101	-0.043	-0.111	0.144	0.168	0.536	0.518
LTRIS2	RNA	RNA	0.085	0.383	0.356	0.094	-0.048	0.144	0.061	0.594	0.706
Helitron1Nb_Mam	LTR	ERV1	0.161	0.158	0.019	-0.059	-0.46	0.137	-0.007	0.581	0.467
ERVB4_3-LTR_MM	LTR	ERVL	0.186	0.34	0.434	0.338	0.298	0.136	0.041	1.062	1.304
IAPEY3-int	LTR	ERVL	0.154	0.285	0.303	0.062	-0.083	0.136	-0.065	0.868	0.91
IAPEY3_LTR	LTR	ERVL	0.154	0.331	0.299	0.013	-0.06	0.134	-0.053	0.769	0.79
BGLII_Mus	LTR	ERVK	0.213	0.277	0.3	-0.104	-0.281	0.132	0.167	0.629	0.596
LTR40b	LTR	ERVL	0.112	0.365	0.388	-0.144	-0.212	0.128	-0.062	0.686	0.863
MER44A	LTR	Gypsy?	0.043	0.109	0.152	0.164	-0.074	0.12	-0.042	0.989	0.773
Helitron1Na_Mam	LTR	ERVL	0.161	0.161	0.284	0.02	-0.007	0.117	0.035	0.852	0.991
RLTR12B	tRNA	tRNA	-0.067	0.257	0.193	0.007	0.031	0.115	0.211	0.574	0.346
(TAGA)n	LTR	ERVL	0.256	0.167	0.336	-0.039	-0.164	0.114	-0.043	0.448	0.484
LTR88b	LTR	ERVK	0.09	-0.061	-0.077	-0.15	-0.204	0.111	0.355	0.545	0.458
ORR1A2	DNA	hAT-Blackjack	-0.048	0.352	0.211	0.297	0.424	0.108	-0.274	0.534	0.789
LTR88a	LTR	ERVL	0.091	0.116	0.482	-0.032	-0.168	0.107	0.225	0.431	0.693
(CAGCC)n	LTR	ERVL	0.446	0.237	0.545	-0.09	-0.035	0.101	0.045	0.252	0.177
7SLRNA	LTR	Gypsy	0.239	0.704	0.64	0.145	-0.06	0.099	-0.155	1.488	1.756
MER49	SINE	B2	0.035	0.275	0.286	0.109	0.063	0.098	0.021	0.239	0.303
(CACTA)n	Simple_repeat	Simple_repeat	0.514	0.172	0.748	-0.643	-0.123	0.096	0.544	0.08	0.747
GC_rich	LTR	ERVL	0.165	0.131	0.205	-0.152	-0.222	0.094	0.156	0.509	0.507
Eulor2C	LTR	ERVK	0.179	0.209	0.257	0.079	-0.127	0.092	0.403	0.338	0.135
MER135	LTR	ERVL-MaLR	0.053	0.234	0.266	0.164	0.184	0.092	-0.076	0.574	0.596
RCHARR1	DNA	hAT-Charlie	-0.055	0.383	0.339	0.217	0.198	0.089	-0.163	0.418	0.471
(CAAGC)n	LTR	ERV1	0.762	0.416	0.469	0.25	0.533	0.084	-0.359	0.246	0.495
LTR86A2	LTR	ERVK	0.094	0.007	0.029	-0.179	-0.289	0.083	0.364	0.078	0.014
LTR75	Unknown	Y-chromosome	0.103	0.15	0.205	-0.271	-0.235	0.082	0.139	0.388	0.304
LTR82B	LTR	ERVL	0.098	0.325	0.431	0.04	-0.021	0.079	-0.094	0.699	0.811
Charlie7a	LTR	ERVL	0.19	0.221	0.213	0.029	-0.003	0.075	-0.006	0.422	0.616
B3A	LTR	ERVL	0.221	0.32	0.437	0.013	-0.192	0.072	-0.056	0.588	0.738
LTR86B2	LTR	ERVL-MaLR	0.092	-0.188	-0.138	-0.206	-0.307	0.072	0.341	0.178	0.087
LTR64	LTR	ERVL	0.106	0.138	0.133	-0.079	-0.131	0.07	0.113	0.402	0.408
MER57E1	LTR	ERVL-MaLR	0.028	0.233	0.29	0.153	0.204	0.068	-0.173	0.661	0.679
Eulor9A	LTR	ERVK	0.169	0.209	0.3	-0.319	-0.491	0.062	0.116	0.438	0.17
HY3	LTR	ERV1	0.158	-0.23	-0.424	0.693	-0.718	0.062	0.114	0.332	0.684
ID4_	LTR	ERVK	0.147	0.318	0.501	-0.17	-0.442	0.06	0.018	0.286	0.041
MER101B	LTR	ERVK	0.074	0.068	0.05	-0.046	-0.136	0.06	0.117	0.563	0.575
MLT1E3	LTR	ERVK	-0.01	0.192	0.201	0.252	0.002	0.059	0.316	0.198	-0.163
IAPLTR3-int	Simple_repeat	Simple_repeat	0.149	0.179	0.255	-0.116	-0.132	0.057	0.181	0.636	0.818
MERX	SINE	B2	-0.003	0.214	0.178	0.131	0.098	0.054	0.003	0.178	0.266
(CAAG)n	tRNA	tRNA	0.842	0.191	0.469	0.33	0.752	0.053	0.124	0.46	-0.273
RMER15-int	srpRNA	srpRNA	-0.165	0.128	0.253	0.026	-0.017	0.052	-0.223	0.225	0.31
LTR80A	LTR	ERVL-MaLR	0.101	0.214	0.266	0.151	0.127	0.051	-0.125	0.513	0.566
(CAGGG)n	Simple_repeat	Simple_repeat	0.436	0.496	0.61	-0.715	0.336	0.047	0.107	1.246	1.259
MER132	SINE	tRNA	0.056	0.09	0.303	0.245	0.277	0.042	-0.177	0.364	0.312
IAPLTR1_Mm	LTR	ERVL	0.154	0.389	0.241	0.056	-0.177	0.04	-0.101	0.671	0.437
Eulor6A	LTR	ERVK	0.177	0.154	0.226	-0.237	-0.285	0.039	0.341	0.203	0.169
LTR16B2	SINE	tRNA	0.132	0.231	0.396	0.265	0.225	0.038	-0.227	0.476	0.431
C573_MM	LTR	ERVK	0.213	-0.086	-0.034	-0.315	-0.357	0.033	0.364	0.466	-0.025
LTR81B	LTR	ERVL	0.1	0.264	0.23	-0.101	-0.129	0.03	-0.037	0.513	0.517
MamGypLTR1c	LTR	ERVL	0.082	0.124	0.277	0.144	0.005	0.029	-0.033	0.262	0.246
MamRep434	LTR	ERVL-MaLR	0.078	0.212	0.257	0.139	0.125	0.027	-0.079	0.535	0.666
Eulor2B	LTR	ERVL	0.179	0.419	0.474	-0.044	-0.169	0.025	-0.01	0.511	0.637
MER96B	LTR	Gypsy?	0	-0.068	-0.107	-0.17	-0.133	0.021	-0.572	0.272	0.374
LTR80B	Simple_repeat	Simple_repeat	0.1	0.108	0.242	-0.081	0.19	0.02	0.04	0.598	0.587
MER88	Simple_repeat	Simple_repeat	0.007	0.08	0.076	-0.213	0.866	0.019	0.294	-0.295	0.689
tRNA-Ser-TCY	LTR	ERV1	-0.38	-0.26	-0.502	0.646	-0.47	0.019	-1.374	0.823	-0.028
LTRIS_Mm	LTR	ERVL-MaLR	0.086	0.244	0.247	0.292	0.363	0.018	-0.08	0.588	0.669
Eulor9B	LTR	ERV1	0.168	-0.011	0.072	-0.375	-0.433	0.017	0.033	0.732	0.823
(CCGGA)n	Satellite	Satellite	0.351	-0.032	0.667	-0.878	-1.011	0.014	0.751	1.392	0.768
FordPrefect	LTR	Gypsy	0.166	-0.179	-0.213	-0.136	-0.149	0.014	-0.356	0.832	0.909
MER90a	LTR	ERVL-MaLR	0.005	0.23	0.205	0.118	0.132	0.012	-0.16	0.487	0.667
RLTR10E	LTR	ERVL-MaLR	-0.063	0.33	0.197	0.149	0.151	0.012	-0.295	0.315	0.669
LTR81C	LTR	ERVL	0.1	0.113	0.284	0.103	0.084	0.011	-0.127	0.308	0.4
Kanga11a	LTR	ERVL	0.144	0.102	0.266	-0.096	-0.263	0.01	0.109	0.496	0.655
Charlie17a	LTR	ERVK	0.198	0.101	0.228	-0.169	-0.256	0.008	0.231	0.358	0.289
UCON16	LTR	ERV1	-0.703	-0.882	0.469	1.153	0.803	0.008	-3.708	-1.281	-2.083
(CGAT)n	LTR	ERVL	0.309	0.209	0.231	0.049	-0.069	0.005	0.04	0.518	0.405
IAPEy-int	LTR?	LTR?	0.154	0.128	0.023	0.025	-0.063	0.003	-0.209	0.595	0.378
MamGypLTR3	LTR	ERVL-MaLR	0.081	0.184	0.163	0.092	0.024	0.002	-0.083	0.531	0.625
(CAACG)n	LTR	ERVL	0.862	0.786	1.269	-0.177	-0.141	0.001	0.664	0.472	0.032
tRNA-Val-GTG	Simple_repeat	Simple_repeat	-0.477	0.265	0.469	-0.965	-1.726	0.001	-0.239	0.628	0.892
MER58A	SINE	Alu	0.026	0.375	0.044	0.562	0.306	0	-0.308	-0.435	0.344
MER57D	LTR	ERVL-MaLR	0.028	0.144	0.203	0.192	0.237	-0.004	-0.152	0.362	0.478
MER113A	LTR	ERVL	0.064	0.129	0.124	-0.015	-0.063	-0.006	-0.044	0.204	0.343
MLT2B1	SINE	Alu	-0.022	0.257	0.209	0.151	0.135	-0.006	-0.113	0.154	0.348
Eulor11	Simple_repeat	Simple_repeat	0.179	0.129	0.196	-0.276	-0.29	-0.007	0.221	0.877	1.066
Eulor6C	Simple_repeat	Simple_repeat	0.173	0.298	0.108	0.151	0.169	-0.01	0.254	-0.399	0.361
RLTR44-int	DNA	hAT-Tip100	-0.128	0.438	0.656	0.638	0.652	-0.011	-0.735	0.841	1.135
(CTTAT)n	tRNA	tRNA	0.286	-0.661	-0.302	0.601	0.359	-0.012	-0.473	0.194	-0.739
LTR79	LTR	ERVL-MaLR	0.102	0.136	0.176	0.094	0.145	-0.012	-0.134	0.452	0.431
LTR16A1	LTR	ERVL	0.134	0.141	0.197	-0.007	-0.126	-0.015	-0.077	0.37	0.522
MLT1G	LTR	ERVL-MaLR	-0.012	0.062	0.206	0.107	0.184	-0.017	-0.061	0.637	0.665
tRNA-Ala-GCY_	LTR	ERVL	-0.277	0.288	0.179	-0.137	0.674	-0.017	0.038	0.57	0.537
UCON6	Simple_repeat	Simple_repeat	-1.395	-1.089	-0.268	-0.407	-1.726	-0.018	0.944	-2.224	0.517
MLT1E1	LTR	ERVL	-0.009	0.2	0.424	-0.071	-0.146	-0.019	-0.075	0.357	0.429
Eulor7	LTR	ERV1	0.169	0.124	0.188	0.017	-0.045	-0.021	-0.099	0.505	0.595
LTR53	LTR	LTR	0.107	-0.171	-0.199	-0.008	0.01	-0.021	0.221	0.687	0.133
MER126	DNA	hAT-Tip100	0.057	0.261	0.179	0.083	-0.132	-0.024	-0.283	0.468	0.626
MamRep1527	LTR	ERVL	0.08	0.248	0.3	0.009	-0.013	-0.026	-0.157	0.514	0.701
LTR55	LTR	ERVL-MaLR	0.107	0.007	0.06	-0.059	-0.159	-0.027	0.026	0.312	0.273
MER50B	LTR	ERV1	0.033	-0.003	0.739	-0.593	0.033	-0.031	0.794	-0.219	0.815
MLT2B4	LTR	ERVL-MaLR	-0.022	0.016	0.083	0.158	0.188	-0.031	-0.156	0.464	0.435
Helitron3Na_Mam	LTR	ERVK	0.159	-0.001	0.046	-0.171	-0.317	-0.032	0.125	0.407	0.232
LTR90A	Simple_repeat	Simple_repeat	0.086	0.384	0.384	0.233	0.181	-0.032	0.039	0.616	0.818
MamGypLTR2b	LTR	ERVK	0.082	0.242	0.392	-0.231	-0.461	-0.033	0.003	0.058	0.022
MamRep1879	LTR	ERVK	0.08	0.125	0.108	0.169	0.156	-0.037	-0.03	0.466	0.479
LTR34	LTR	ERVL	0.115	0.1	0.135	-0.044	-0.118	-0.04	-0.061	0.427	0.477
MER5A	LTR	ERVL	0.024	0.206	0.19	0.293	0.226	-0.046	-0.087	0.365	0.504
HY5	DNA	hAT-Tip100	0.156	0.28	0.435	-0.152	-0.083	-0.048	-0.223	0.773	0.921
MER63D	DNA	hAT-Tip100	0.02	0.356	0.368	0.008	-0.169	-0.05	-0.212	0.36	0.666
MER70A	LTR	ERVL-MaLR	0.016	0.134	0.14	0.136	0.148	-0.053	-0.139	0.562	0.706
(CTAAT)n	tRNA	tRNA	0.296	0.219	0.452	0.287	0.543	-0.055	-0.196	0.352	0.596
MER34A	LTR	ERVL-MaLR	0.045	0.139	0.174	0.024	0.015	-0.057	-0.169	0.362	0.454
ALINE	Simple_repeat	Simple_repeat	0.238	-0.036	0.394	0.033	0.21	-0.059	0.66	-1.304	-0.99
MLT1G1	LTR	ERV1	-0.013	0.331	0.123	0.064	0.055	-0.06	-0.129	0.528	0.906
MTC	SINE	Alu	-0.039	0.221	0.166	0.144	0.139	-0.061	-0.141	0.077	0.261
MER21-int	LTR	ERVL	0.051	0.123	0.193	0.049	-0.067	-0.062	-0.158	0.279	0.448
Charlie14a	LINE	L1	0.201	-0.439	-0.54	-0.422	-0.611	-0.063	0.42	0.769	0.129
MER66C	SINE	B4	0.018	0.268	0.243	0.143	0.1	-0.063	-0.201	0.106	0.253
MER63C	LTR	ERV1	0.021	0.144	0.096	0.182	0.205	-0.065	-0.221	0.295	0.589
Looper	Simple_repeat	Simple_repeat	0.135	0.523	0.267	-0.303	-0.253	-0.07	0.349	1.339	1.762
MER2	LTR	ERVK	0.053	0.147	0.219	-0.229	-0.365	-0.073	-0.008	0.322	0.281
MT-int	LTR	Gypsy	-0.043	0.174	0.16	0.109	0.012	-0.076	-0.215	0.435	0.616
Eulor12	LTR	ERVL	0.179	0.508	-0.16	0.234	0.123	-0.077	-0.141	0.577	0.56
MER5A1	LTR	ERVK	0.024	-0.191	-0.044	-0.315	-0.429	-0.078	0.118	0.619	0.147
tRNA-Thr-ACY_	Simple_repeat	Simple_repeat	-0.431	-0.39	0.093	-0.006	-0.109	-0.078	0.054	0.144	0.441
Charlie18a	LTR	ERVL	0.198	0.302	0.351	0.136	-0.024	-0.082	-0.157	0.351	0.418
LTR16D2	LTR	ERVL-MaLR	0.13	0.142	0.08	0.099	0.015	-0.082	-0.239	0.319	0.237
MER83A-int	LTR	ERVL	0.008	0.185	0.171	0.28	0.237	-0.082	-0.267	0.108	0.237
U8	DNA?	DNA?	-0.598	-0.519	0.008	-0.262	0.031	-0.082	-1.448	-0.063	-0.198
MER34-int	LTR	ERVK	0.044	-0.085	-0.118	-0.131	-0.15	-0.083	0.076	0.684	0.693
MLT1C	DNA	hAT-Charlie	-0.007	0.302	0.168	0.266	0.214	-0.085	-0.286	0.264	0.494
LTR39	LTR	ERVL	0.113	0.181	0.262	0.015	-0.08	-0.086	-0.084	0.419	0.366
MIR3	SINE	B4	-0.004	0.222	0.179	0.142	0.122	-0.09	-0.237	0.21	0.425
Charlie1	Simple_repeat	Simple_repeat	0.208	0.062	0.258	-0.212	-0.082	-0.095	0.243	0.713	1.069
MamRep4096	DNA	hAT-Charlie	0.078	0.125	0.119	0.134	0.107	-0.095	-0.208	0.358	0.423
MER124	DNA	hAT	0.059	0.115	0.344	-0.008	0.078	-0.095	-0.151	0.755	0.889
MER57F	DNA	hAT-Charlie	0.027	0.14	0.142	0.158	0.153	-0.095	-0.282	0.387	0.415
MMVL30-int	LTR	Gypsy?	-0.033	0.037	0.221	0.246	0.428	-0.098	-0.386	0.551	0.456
LFSINE_Vert	Simple_repeat	Simple_repeat	0.135	0.379	0.457	-0.181	-0.081	-0.099	0.003	0.027	0.21
MTA_Mm	DNA	hAT-Blackjack	-0.035	0.009	0.15	0.169	0.201	-0.099	-0.277	0.432	0.525
MuLV-int	LTR	Gypsy	-0.043	0.129	-0.13	0.31	0.218	-0.1	-0.337	0.542	0.519
(CAGGA)n	Simple_repeat	Simple_repeat	0.439	0.259	0.358	-0.138	-0.088	-0.101	0.159	0.455	0.739
(CCAA)n	LTR	ERV1	0.377	-0.274	0.366	0.116	-0.475	-0.103	-0.342	0.525	1.24
MER68-int	DNA	hAT-Charlie	0.016	0.083	0.023	0.088	0.165	-0.105	-0.235	0.5	0.567
LTR48	LTR	ERVK	0.108	0.155	0.18	-0.173	-0.325	-0.11	-0.028	0.276	0.41
MER5C1	LTR	ERVL-MaLR	0.023	0.059	0.093	0.09	0.109	-0.11	-0.204	0.494	0.599
MER58B	DNA	hAT-Charlie	0.026	0.116	0.102	0.18	0.133	-0.114	-0.259	0.299	0.345
MER74A	Simple_repeat	Simple_repeat	0.012	0.169	-0.595	0.104	-0.059	-0.117	-0.388	0.86	-0.194
Charlie23a	LTR	ERVK	0.194	0.065	0.114	-0.274	-0.401	-0.118	0.213	0.504	0.268
(CGGGA)n	DNA?	DNA?	0.301	-0.109	-0.088	0.245	0.156	-0.119	-0.075	0.381	-0.088
LTR84a	LTR	ERVL	0.097	0.045	0.04	0.004	-0.049	-0.121	-0.088	0.302	0.48
CR1_Mam	tRNA	tRNA	0.19	-1.013	0.117	0.849	1.364	-0.123	-0.172	0.174	0.8
MER68	LTR	Gypsy?	0.016	0.189	0.24	0.605	0.725	-0.123	-0.267	0.194	0.571
MER105	Simple_repeat	Simple_repeat	0.07	0.334	0.43	-0.769	-0.141	-0.124	0.303	0.556	0.623
RMER17A-int	DNA	DNA	-0.171	0.023	0.14	-0.215	-0.47	-0.125	-0.067	0.219	-0.308
(CATAG)n	Unknown	Unknown	0.399	0.112	0.133	0.172	0.251	-0.126	-0.297	-0.441	-0.169
RMER4A	Simple_repeat	Simple_repeat	-0.204	0.635	-0.368	-0.353	-0.377	-0.128	-0.044	-0.138	-0.204
(CAGT)n	DNA?	DNA?	0.434	0.529	0.712	0.574	0.428	-0.134	-0.075	0.163	0.729
MER57E2	LTR	ERVL	0.027	0.221	0.185	-0.004	0	-0.137	-0.255	0.238	0.234
MER63B	LTR	ERVL-MaLR	0.021	0.086	0.057	0.189	0.29	-0.137	-0.244	0.591	0.646
ORSL	LTR	Gypsy?	-0.051	0.132	-0.02	0.194	0.05	-0.137	-0.377	0.116	0.274
MER129	LTR	ERVK	0.057	0.19	0.266	-0.225	-0.373	-0.138	-0.082	0.148	-0.003
B1_Mus1	LTR	ERV1	0.228	-0.314	0.974	-1.217	-0.846	-0.141	1.343	-0.571	-0.385
tRNA-Ala-GCG	LTR	ERVK	-0.266	-0.081	-0.203	0.212	0.55	-0.142	-0.055	-0.048	0.17
LTR85a	LTR	ERVL	0.096	0.043	-0.019	-0.034	0.043	-0.145	-0.226	0.413	0.302
MLT1J-int	snRNA	snRNA	-0.018	-0.001	0.023	0.16	0.32	-0.145	-0.374	0.345	0.324
MER123	LTR	ERVL	0.059	-0.004	0.094	-0.088	-0.134	-0.15	-0.271	0.228	0.318
ORR1A4	Simple_repeat	Simple_repeat	-0.049	0.289	0.34	0.366	0.733	-0.151	-0.043	-0.18	0.487
IAPEz-int	LTR	ERV1	0.154	-0.014	0.022	-0.103	-0.318	-0.154	-0.273	0.191	0.677
(CCGTA)n	LTR	ERVL	0.348	0.482	0.146	-0.086	-0.222	-0.156	-0.176	0.65	0.343
ID4	LTR	ERV1	0.147	0.148	-0.031	0.258	-0.099	-0.157	-0.411	0.532	0.435
MLT2F	SINE	Alu	-0.026	0.171	0.135	0.224	0.216	-0.158	-0.292	0.031	0.183
MER45C	LTR	ERVL	0.038	0.17	0.235	0.17	0.153	-0.167	-0.324	0.085	0.083
MER45R	LTR	ERVL?	0.038	0.045	0.126	0.055	0.028	-0.168	-0.299	0.414	0.492
MER99	LTR	ERV1	-0.001	-0.037	-0.034	-0.025	-0.039	-0.168	-0.202	0.464	0.549
RLTR12A	Unknown	Unknown	-0.066	0.253	0.489	0.122	0.077	-0.168	0.082	0.315	-0.164
MamGypLTR2c	LTR	ERVL-MaLR	0.081	0.028	0.054	-0.018	-0.076	-0.17	-0.249	0.294	0.206
MLT2E	snRNA	snRNA	-0.025	0.045	-0.082	0.163	0.174	-0.17	-0.285	0.09	0.128
MTD	LTR	ERVL-MaLR	-0.04	0.122	0.084	0.231	0.246	-0.174	-0.272	0.257	0.352
MER34	LTR	ERVK	0.046	-0.136	-0.098	-0.178	-0.148	-0.175	0.015	-0.011	0.179
MER131	LTR	ERVL	0.056	0.105	0.205	0.102	0.163	-0.181	-0.5	0.084	0.257
ORR1A1	SINE	Alu	-0.048	0.158	0.097	0.18	0.16	-0.181	-0.274	-0.049	0.16
(GGGA)n	LTR	ERV1	0.272	0.112	0.27	-0.193	-0.359	-0.182	-0.206	0.708	0.62
LTR89	LTR	ERVL	0.088	0.01	0.014	-0.095	-0.148	-0.184	-0.132	0.288	0.264
MER134	LTR	ERVL	0.053	0.166	0.323	0.252	0.48	-0.184	-0.118	0.168	0.26
MamGyp-int	LTR	ERVL	0.083	0.119	0.07	-0.054	-0.101	-0.188	-0.164	0.49	0.549
MER110	LTR	ERVK	0.068	0.008	0.045	-0.112	-0.138	-0.189	-0.043	0.171	0.224
MLT2B2	LTR	ERVL	-0.022	0.001	0.09	0.268	0.239	-0.189	-0.433	-0.012	0.199
MER96	LTR	ERVL	0.001	0.097	0.089	0.189	0.222	-0.19	-0.255	0.206	0.315
Ricksha_a	SINE	Alu	-0.057	0.191	0.117	0.309	0.314	-0.193	-0.297	-0.222	0.001
MLT1M	rRNA	rRNA	-0.021	0.185	0.136	0.164	0.137	-0.195	-0.232	0.94	0.964
(AGGGGG)n	tRNA	tRNA	2.998	0.496	0.469	2.652	4.614	-0.199	1.578	0.098	0.032
(CA)n	Simple_repeat	Simple_repeat	2.065	1.233	1.691	0.33	-0.141	-0.199	-0.007	1.32	1.617
(CAAAAA)n	Simple_repeat	Simple_repeat	1.775	0.496	0.469	0.33	-0.141	-0.199	-0.007	0.098	0.032
(CAATT)n	Simple_repeat	Simple_repeat	0.676	-0.241	0.469	0.816	0.345	-0.199	0.478	-2.224	0.032
(CACCG)n	tRNA	tRNA	0.577	-0.882	-0.91	0.975	1.85	-0.199	-0.769	-0.664	-1.553
(CAGA)n	tRNA	tRNA	0.495	-0.132	-1.297	-0.057	0.416	-0.199	-2.51	1.368	1.672
Charlie2a	Simple_repeat	Simple_repeat	0.19	0.496	2.054	1.915	1.444	-0.199	2.315	0.098	1.617
Charlie5	Simple_repeat	Simple_repeat	0.19	0.496	0.469	0.33	-0.141	-0.199	2.315	0.098	0.032
Charlie7	Simple_repeat	Simple_repeat	0.19	0.496	0.469	0.33	-0.141	-0.199	-0.007	2.42	2.839
HAL1-2a_MD	LTR	ERV1	0.163	-0.103	0.097	0.028	-0.015	-0.199	-0.176	0.26	0.038
MER92A	tRNA	tRNA	0.004	0.207	-0.328	0.84	1.385	-0.199	-0.297	-0.423	-0.369
ORR1D-int	Simple_repeat	Simple_repeat	-0.051	-0.572	0.329	-0.266	-0.141	-0.199	-0.248	-0.88	0.238
ORR1E	Simple_repeat	Simple_repeat	-0.051	0.703	-0.062	-1.048	-0.382	-0.199	-2.123	-1.281	-0.861
Tigger13a	Simple_repeat	Simple_repeat	-0.235	0.071	-0.013	-0.176	0.062	-0.199	-0.093	0.115	0.616
tRNA-Glu-GAA	LTR	ERVK	-0.295	-0.123	0.106	-1.74	-1.26	-0.199	-0.102	0.187	-1.19
U5	tRNA	tRNA	-0.58	-0.455	-0.482	0.601	1.305	-0.199	-0.958	-1.59	-1.126
MER104	LTR	ERVL-MaLR	0.072	0.037	0.014	-0.03	-0.088	-0.2	-0.245	0.208	0.239
RLTR13A3	SINE	B2	-0.07	0.202	0.143	-0.071	-0.079	-0.2	-0.11	-0.131	-0.048
PB1D10	SINE	Alu	-0.053	0.119	0.032	0.17	0.178	-0.202	-0.267	-0.033	0.134
MER20B	LTR	ERVK	0.053	-0.019	-0.065	-0.122	-0.204	-0.205	-0.095	0.155	0.265
MER92B	SINE	ID	0.003	0.19	0.135	0.208	0.194	-0.205	-0.367	0.094	0.26
ORR1B1	SINE	Alu	-0.05	0.134	0.102	0.184	0.196	-0.207	-0.307	-0.045	0.127
MT2_Mm	SINE	Alu	-0.033	0.161	0.099	0.216	0.193	-0.209	-0.316	0.051	0.217
LTRIS4	LTR	ERVL	0.084	-0.061	-0.075	0.054	0.069	-0.21	-0.284	0.223	0.052
MusHAL1	SINE	Alu	-0.046	0.11	0.062	0.197	0.193	-0.211	-0.313	0.058	0.207
MER106B	LTR	ERVL-MaLR	0.07	0.024	0.033	0.017	-0.039	-0.212	-0.261	0.362	0.376
MIRb	LTR	ERVL-MaLR	-0.004	0.043	0.058	-0.021	0.011	-0.215	-0.254	0.127	0.201
Tigger12c	DNA	PiggyBac?	-0.233	0.183	0.164	0.449	0.262	-0.215	-0.475	-0.025	0.093
MTE-int	DNA	hAT-Charlie	-0.043	0.168	0.303	0.3	0.118	-0.218	-0.287	0.29	0.258
MER47A	LTR	ERVL	0.037	-0.098	-0.078	0.123	-0.026	-0.224	-0.275	0.065	-0.024
MER89	LTR	ERVL-MaLR	0.007	-0.014	-0.016	-0.054	-0.111	-0.225	-0.229	0.239	0.285
RLTR19	SINE	B2	-0.087	0.074	-0.018	0.019	0.027	-0.225	-0.16	-0.137	-0.008
MLT2D	tRNA	tRNA	-0.025	0.212	0.067	0.259	0.233	-0.228	-0.354	0.07	0.235
RLTR13D3	SINE	Alu	-0.077	0.161	0.085	0.257	0.296	-0.229	-0.35	-0.059	0.163
RLTR20B2	Simple_repeat	Simple_repeat	-0.096	-0.243	-0.174	-0.206	-0.036	-0.229	-0.209	0.233	0.245
LTR16C	LTR	ERVK	0.132	0.126	0.113	-0.143	-0.238	-0.23	-0.169	0.254	0.354
RLTR19B	Unknown	Unknown	-0.089	0.186	0.101	0.247	0.04	-0.23	-0.519	-0.052	0.047
MLT1N2	LTR	ERVL	-0.021	0.041	0.015	0.115	0.139	-0.234	-0.274	0.164	0.254
RMER20A	snRNA	snRNA	-0.191	0.186	0.431	-0.152	0.176	-0.236	-0.084	-1.201	-0.835
LTR83	LTR	ERVL	0.097	0.083	-0.054	0.351	0.417	-0.237	-0.516	0.566	0.353
MTE2b	LTR	ERVK	-0.041	-0.127	-0.155	0.041	0.018	-0.237	-0.174	0.191	0.227
RLTR16	LTR	ERVL	-0.084	0.098	0.083	-0.056	-0.027	-0.242	-0.304	0.48	0.656
MER125	LTR	ERVL-MaLR	0.058	-0.025	-0.053	-0.03	-0.086	-0.247	-0.278	0.242	0.24
(TAGG)n	Simple_repeat	Simple_repeat	0.255	0.168	0.277	-0.229	-0.115	-0.248	-0.018	0.363	0.422
MER63A	LTR	ERV1	0.021	-0.082	0.027	0.075	0.011	-0.249	-0.39	0.306	0.481
MER112	LTR	ERVK	0.065	-0.234	-0.284	-0.339	-0.465	-0.25	0.12	0.08	-0.318
MER133B	DNA	MULE-MuDR	0.054	-0.082	-0.153	-0.165	-0.151	-0.25	-0.308	0.301	0.175
MuRRS4-int	SINE	Alu	-0.043	0.116	0.049	0.202	0.204	-0.251	-0.37	0	0.183
Ricksha_0	LTR	ERV1	-0.056	-0.146	-0.073	0.481	0.341	-0.253	-0.062	0.225	0.353
MER136	LTR	ERVL	0.053	-0.081	-0.025	0.008	0.003	-0.255	-0.274	0.184	0.172
LTR45	LTR	ERVL	0.109	-0.045	-0.057	-0.003	-0.069	-0.258	-0.253	0.241	0.196
Charlie2b	Simple_repeat	Simple_repeat	0.19	-0.074	-0.622	-0.641	-0.141	-0.259	0.4	-0.563	0.145
RLTR20A	LTR	ERVK	-0.094	-0.149	-0.222	0.306	0.503	-0.26	-0.248	-0.099	-0.175
MLT1H2	DNA	hAT-Charlie	-0.016	-0.009	0.015	0.061	0.105	-0.261	-0.358	0.268	0.347
MMTV-int	SINE	ID	-0.033	0.17	0.107	0.23	0.237	-0.261	-0.343	0.077	0.323
MER90	SINE	ID	0.006	0.129	0.04	0.199	0.182	-0.263	-0.405	0.025	0.189
MLT1F1	LTR	ERV1	-0.011	0.037	-0.046	0.191	0.341	-0.263	-0.271	0.145	0.253
LTR86B1	LTR	ERVK	0.093	-0.039	-0.035	-0.14	-0.292	-0.267	-0.213	0.329	0.168
MER44D	LTR	ERVL-MaLR	0.041	-0.05	-0.087	-0.011	-0.06	-0.267	-0.253	0.316	0.352
Eulor9C	Simple_repeat	Simple_repeat	0.167	0.14	-0.079	-0.026	0.192	-0.271	0.05	-0.143	0.067
(TAA)n	LTR	ERVL	0.264	0.129	0.165	0.164	-0.257	-0.272	0.013	0.182	-0.09
4.5SRNA	LTR	ERVL	0.241	-0.049	0.025	0.137	0.106	-0.273	-0.323	-0.72	-0.491
PB1D9	LTR	ERVL	-0.054	-0.056	0.052	0.081	-0.03	-0.273	-0.456	-0.028	0.036
MER45B	DNA	hAT-Charlie	0.038	0.212	0.287	0.386	0.009	-0.278	-0.384	0.265	0.344
Charlie16a	Simple_repeat	Simple_repeat	0.199	0.028	0.192	-0.277	-0.111	-0.279	0.304	0.116	0.343
MLT1J1	LTR	Gypsy	-0.018	-0.118	-0.073	-0.179	0.005	-0.279	-0.366	-0.068	0.147
RLTR10	DNA	hAT-Charlie	-0.06	0.117	0.099	0.41	0.41	-0.282	-0.458	0.068	0.161
LTR37B	LTR	Gypsy	0.113	-0.05	-0.042	0.006	0.14	-0.286	-0.476	0.568	0.629
UCON14	tRNA	tRNA	-0.666	0.263	-1.074	1.159	1.415	-0.288	-0.716	0.773	-0.306
MamGypLTR1d	LTR	ERVK	0.082	-0.053	-0.072	-0.066	-0.199	-0.292	-0.166	0.006	0.056
LTR32	LTR	ERV1	0.121	-0.101	-0.109	-0.158	-0.318	-0.299	-0.295	0.118	0.274
MER106A	LINE	L2	0.07	0.001	-0.014	0.12	0.081	-0.299	-0.326	0.198	0.227
MamGypLTR1a	DNA	TcMar-Tigger	0.083	-0.094	-0.325	0.633	0.521	-0.301	-0.747	-0.135	-0.099
MER47B	DNA	hAT-Tip100	0.037	0.074	0.038	0.028	-0.071	-0.301	-0.531	0.268	0.396
tRNA-Ser-TCG	Unknown	Unknown	-0.373	-0.091	0.029	0.023	0.065	-0.305	-0.405	-0.513	0.231
MIR	tRNA	tRNA	-0.003	0.133	0.196	0.294	0.251	-0.306	-0.565	-0.168	0.148
Tigger11a	LTR	ERV1	-0.229	-0.321	-0.059	-0.055	0.245	-0.307	-0.693	1.263	1.422
MER4B-int	LTR	ERVL-MaLR	0.034	-0.033	-0.052	-0.055	-0.083	-0.308	-0.312	0.245	0.3
ORR1A3	LTR	ERV1	-0.048	-0.105	0.009	0.001	0.043	-0.308	-0.284	0.126	0.319
MER74B	LTR	ERVL	0.012	-0.115	-0.069	0.12	0.014	-0.313	-0.527	0.194	0.361
MER113	DNA	hAT-Charlie	0.064	-0.391	-0.277	0.058	0.171	-0.317	-0.279	-0.336	-0.402
RLTR14	RC	Helitron	-0.082	0.003	-0.158	0.104	0.093	-0.32	-0.364	0.277	0.131
RLTR46	LTR	ERV1	-0.132	-0.079	0.103	0.195	0.112	-0.32	-0.622	0.194	0.628
MER73	scRNA	scRNA	0.013	0.147	-0.041	0.445	0.487	-0.323	-0.483	-0.001	0.293
MER46C	LTR	ERVL-MaLR	0.038	-0.057	-0.046	-0.027	-0.081	-0.326	-0.314	0.186	0.228
U13	Unknown	Unknown	-0.506	-0.014	-0.195	0.133	0.546	-0.327	-0.181	-0.702	-0.918
MER44B	LTR	Gypsy	0.043	0.19	0.073	0.055	0.021	-0.332	-0.386	0.39	0.493
RLTR11B	Unknown	Unknown	-0.066	0.049	0.079	0.073	-0.206	-0.333	-0.855	0.032	-0.537
tRNA-Pro-CCG	tRNA	tRNA	-0.347	0.559	-0.165	-0.208	-0.423	-0.333	-0.744	1.746	1.574
LTR87	LTR	ERVL?	0.091	0.079	0.101	0.216	0.144	-0.335	-0.358	0.255	0.174
RLTR5_Mm	DNA	hAT-Charlie	-0.134	0.023	0.048	0.173	0.081	-0.338	-0.472	0.19	0.166
BGLII	snRNA	snRNA	0.217	-0.446	-0.123	0.366	0.94	-0.34	-0.409	0.235	0.535
MER34A1	LTR	ERVK	0.045	-0.08	-0.111	-0.071	-0.186	-0.341	-0.237	0.023	-0.053
MER47C	LTR	ERV1	0.036	0.045	-0.04	-0.04	-0.046	-0.341	-0.275	0.327	0.334
MTEa	SINE	Deu	-0.042	0.029	0.009	0.488	0.815	-0.341	-0.42	-0.197	-0.276
MER67D	DNA	hAT-Charlie	0.016	-0.245	-0.251	0.033	0.054	-0.342	-0.239	0.362	-0.099
(CAGCT)n	tRNA	tRNA	0.442	1.148	0.164	2.758	2.607	-0.343	-0.312	0.66	-1.19
tRNA-His-CAY	Simple_repeat	Simple_repeat	-0.302	0.099	0.723	-0.162	0.305	-0.345	-0.654	0.464	1.322
MTC-int	SINE	MIR	-0.039	0.054	-0.01	0.257	0.286	-0.346	-0.506	0.283	0.431
RMER12	SINE	B2	-0.151	0.126	0.109	-0.093	-0.035	-0.348	-0.218	-0.341	-0.187
RLTR9B2	DNA	hAT-Tip100	-0.139	0.087	-0.079	0.146	0.036	-0.35	-0.604	0.038	0.287
ORR1B2	DNA	TcMar-Tigger	-0.05	-0.072	-0.09	0.106	0.144	-0.355	-0.439	-0.031	-0.058
MT2B2	LTR	ERVL	-0.034	-0.212	-0.211	-0.084	-0.1	-0.356	-0.426	0.477	0.471
tRNA-Ala-GCA	LTR	ERV1	-0.26	-0.322	0.209	-0.339	-0.632	-0.356	-0.774	-0.571	-0.159
MER51-int	DNA	TcMar-Pogo	0.032	0.338	-0.07	-0.054	-0.218	-0.357	-0.546	0.677	0.395
LTR59	LTR	Gypsy?	0.106	0.035	-0.142	0.075	0.018	-0.359	-0.185	0.607	0.45
UCON1	tRNA	tRNA	-0.598	-2.167	-0.079	0.764	0.216	-0.359	-0.886	0.287	-0.02
UCON11	tRNA	tRNA	-0.612	0.049	0.262	0.511	0.17	-0.361	-0.128	-0.022	0.178
tRNA-Gly-GGY	Unknown	Unknown	-0.301	-0.053	-0.081	-0.006	-0.004	-0.365	-0.618	0.421	-0.01
LTR86A1	LTR	ERV1	0.094	-0.04	-0.04	-0.007	-0.079	-0.371	-0.361	0.069	0.293
LTR68	tRNA	tRNA	0.105	0.225	-0.754	1.309	1.576	-0.374	-1.23	-0.173	-0.342
MER77	Simple_repeat	Simple_repeat	0.01	0.496	-1.297	-1.435	-0.528	-0.379	-0.635	-0.53	-0.355
RMER16	LTR	ERV1	-0.165	0.044	-0.159	-0.336	-0.215	-0.379	-0.493	0.049	-0.263
Eulor5B	LTR	Gypsy	0.177	0.147	0.323	-0.044	0.151	-0.385	-0.493	0.166	0.402
MER31B	LTR	ERVK	0.048	-0.275	-0.477	-0.179	-0.262	-0.385	-0.13	-0.033	0.09
RLTR1B	LINE	CR1	-0.093	-0.141	-0.163	0.144	0.066	-0.385	-0.559	0.39	0.174
MTEb	DNA	hAT-Tip100?	-0.042	0.019	-0.324	0.005	0.045	-0.386	-0.735	0.408	0.222
MuRRS-int	scRNA	scRNA	-0.044	0.047	0.033	0.141	0.113	-0.386	-0.443	-0.039	0.086
MurSAT1	LTR	ERVL	-0.044	-0.173	-0.12	-0.109	-0.173	-0.386	-0.338	0.105	0.086
MER58D	LTR	ERVL-MaLR	0.025	-0.105	-0.111	0.055	-0.015	-0.388	-0.376	-0.013	-0.049
MLT1A	LTR	ERVK	-0.005	-0.122	-0.138	0.018	-0.005	-0.395	-0.367	-0.001	0.152
PB1D7	SINE	MIR	-0.053	-0.028	-0.054	0.151	0.164	-0.398	-0.495	0.191	0.339
MURVY-LTR	DNA	hAT-Charlie	-0.045	-0.17	-0.193	0.148	0.205	-0.401	-0.434	-0.068	-0.213
RLTR13B3	DNA?	DNA?	-0.071	0.111	0.429	0.116	-0.402	-0.413	-0.473	-0.027	-0.159
RLTR10-int	DNA	hAT-Blackjack	-0.064	-0.111	-0.122	0.169	0.208	-0.414	-0.583	0.128	0.11
RLTR20A2	LTR	ERVL	-0.095	-0.19	-0.214	-0.004	0.072	-0.414	-0.451	0.07	0.081
RMER10B	LTR	ERV1	-0.15	-0.104	-0.204	0.042	0.092	-0.414	-0.42	-0.079	-0.127
RLTR13D6	LTR	ERV1	-0.081	-0.002	-0.12	0.369	0.39	-0.416	-0.624	0.496	0.57
(CAGTT)n	LTR	ERV1	0.42	-0.033	-0.014	-0.109	0.195	-0.42	-0.029	0.572	0.233
L3	SINE	Deu	0.138	0.135	0.057	0.317	0.143	-0.42	-0.48	-0.057	-0.204
MER66-int	LTR	ERV1	0.017	-0.006	-0.143	-0.067	-0.074	-0.423	-0.316	0.181	0.252
MER115	LTR	ERV1	0.063	-0.25	-0.173	-0.092	-0.118	-0.425	-0.315	0.035	0.051
(TGAG)n	LINE	L1	0.252	0.14	0.22	-0.196	-0.112	-0.427	-0.123	0.112	0.124
MER76	Simple_repeat	Simple_repeat	0.011	0.706	1.4	-0.479	0.081	-0.427	-0.356	0.457	1.327
RLTR19-int	DNA	TcMar-Tigger	-0.092	-0.008	-0.206	0.08	-0.045	-0.428	-0.468	0.125	0.046
Tigger16b	LTR	ERV1	-0.243	-0.374	-0.273	0.293	-0.239	-0.429	-0.689	0.471	0.158
RLTR1D	LTR	ERV1	-0.094	-0.111	-0.079	0.029	0.087	-0.43	-0.453	0.031	-0.046
MER52-int	LTR	Gypsy	0.03	0.149	-0.141	-0.058	0.203	-0.431	-0.265	0.307	0.412
MER31A	LTR	ERVL	0.049	0.294	0.267	0.507	0.013	-0.432	-0.559	0.071	0.209
MER57C2	LTR	ERV1	0.029	-0.159	-0.309	0.122	-0.093	-0.432	-0.421	-0.079	0.195
MER110-int	LTR	ERVK	0.065	-0.272	-0.224	-0.154	-0.243	-0.435	-0.241	0.028	-0.241
MLT1I	LTR	ERVL-MaLR	-0.017	-0.249	-0.156	0.007	0.016	-0.437	-0.397	-0.004	0.103
MIRc	LTR	ERVL	-0.005	-0.122	-0.121	0.045	-0.061	-0.438	-0.396	0.02	0.021
ORR1C2	SINE	MIR	-0.05	-0.07	-0.123	0.153	0.176	-0.439	-0.526	0.107	0.216
MLT1F-int	DNA	hAT-Tip100	-0.012	0.082	-0.201	0.044	-0.024	-0.44	-0.587	0.368	0.438
LTR78	LTR	ERV1	0.102	-0.057	-0.12	0.175	0.169	-0.441	-0.409	0.416	0.155
RLTR13C1	LTR	Gypsy	-0.073	-0.24	-0.271	0.067	-0.014	-0.447	-0.482	0.208	0.312
(CAG)n	tRNA	tRNA	0.501	0.1	0.349	1.709	1.984	-0.45	-0.403	-0.154	-0.364
MER117	LTR	ERVL-MaLR	0.063	-0.195	-0.247	-0.214	-0.172	-0.45	-0.405	0.044	-0.018
U6	DNA	hAT-Charlie	-0.59	-0.206	-0.596	0.105	0.575	-0.451	-0.71	-0.394	-0.709
MER121	LTR?	LTR?	0.061	-0.191	-0.214	0.217	0.281	-0.452	-0.487	0.012	0.045
MER5C	DNA	hAT-Tip100	0.023	-0.245	-0.11	-0.042	-0.087	-0.453	-0.442	0.048	0.072
MER65-int	LTR	ERVK	0.02	-0.632	-0.658	-0.335	-0.445	-0.454	-0.041	0.072	-0.455
MER57-int	LTR	ERVK	0.027	-0.142	-0.134	-0.034	-0.082	-0.455	-0.45	0.27	0.295
ORR1A3-int	DNA	TcMar-Tigger	-0.048	-0.126	-0.133	0.146	0.138	-0.46	-0.569	-0.222	-0.463
ORR1D1	DNA	TcMar-Tigger	-0.05	-0.141	-0.155	0.067	-0.011	-0.461	-0.49	-0.066	-0.041
UCON13	tRNA	tRNA	-0.653	-0.654	-0.783	-0.074	0.244	-0.464	-0.701	0.395	-0.462
RLTR9C	Unknown	Unknown	-0.14	-0.076	-0.206	0.253	0.247	-0.471	-0.424	-0.151	-0.175
MER67A	DNA	hAT-Blackjack	0.017	-0.475	-0.251	0.041	0.069	-0.477	-0.289	-0.29	-0.331
(CCCGAA)n	DNA?	DNA?	0.364	-0.166	0.103	0.816	0.899	-0.478	-0.259	-0.564	-0.705
LTR85c	LTR	ERV1	0.095	-0.248	-0.228	0.439	0.363	-0.48	-0.254	0.698	0.957
LTR33A	LTR	ERV1	0.12	-0.111	-0.096	0.303	0.355	-0.482	-0.435	0.115	0.011
MER87	tRNA	tRNA	0.008	-0.434	0.114	0.466	1.053	-0.482	-0.399	1.133	1.559
tRNA-Gly-GGA	DNA	hAT	-0.3	0.668	0.274	0.43	0.303	-0.485	-0.06	-0.189	0.108
tRNA-Val-GTA	Unknown	Unknown	-0.454	-0.415	-0.303	-0.198	0.378	-0.485	-1.02	0.222	0.336
RLTR11A	DNA	TcMar-Mariner	-0.065	-0.216	-0.262	-0.102	0.06	-0.488	-0.627	-0.548	-0.658
RLTR8	DNA	hAT-Charlie	-0.136	-0.119	-0.145	0.155	0.147	-0.493	-0.576	-0.163	-0.123
MMETn-int	LTR	ERV1	-0.028	-0.232	-0.403	-0.158	-0.235	-0.494	-0.425	0.167	0.245
MamRep564	LTR	ERVL-MaLR	0.077	-0.203	-0.198	0.118	0.147	-0.496	-0.379	-0.005	-0.004
LTR77	DNA?	DNA?	0.102	0.036	-0.047	0.343	0.591	-0.497	-0.314	0.168	-0.299
ORR1C1	SINE	MIR	-0.05	-0.117	-0.167	0.136	0.159	-0.499	-0.565	0.045	0.13
MTB	LINE	CR1	-0.036	-0.202	-0.217	0.143	0.16	-0.5	-0.55	0.089	0.058
RLTR20A1	DNA	MER2_type	-0.095	-0.206	-0.255	0.198	0.297	-0.504	-0.469	-0.343	-0.297
(CTAGT)n	LTR	ERVL	0.287	-0.227	-0.248	0.267	0.112	-0.506	-0.535	-0.521	-0.266
MT2A	DNA	TcMar-Tigger	-0.033	-0.257	-0.25	0.185	0.231	-0.506	-0.648	-0.063	-0.113
MT2B	DNA?	DNA?	-0.034	-0.738	-0.472	0.044	-0.469	-0.506	-0.982	-0.167	0.342
RLTR9B	DNA	TcMar-Tigger	-0.137	-0.441	0.069	-0.147	-0.145	-0.508	-0.727	-0.132	-0.198
RMER3D4	DNA	hAT-Charlie	-0.2	-0.141	-0.152	0.002	0.027	-0.51	-0.516	-0.065	0.068
ORR1B1-int	LTR	ERVL	-0.05	0.191	0.002	-0.137	-0.157	-0.511	-0.416	0.463	0.131
UCON12A	LTR	ERV1	-0.644	-0.774	-0.031	-0.169	0.568	-0.512	-0.236	0.671	1.049
(TTAAA)n	LTR	ERVL	0.244	-0.063	-0.18	0.432	0.528	-0.513	-0.311	0.139	0.297
RLTR9A	DNA	hAT-Charlie	-0.137	-0.102	-0.092	0.101	0.15	-0.513	-0.627	0	-0.064
tRNA-SeC(e)-TGA	tRNA	tRNA	-0.353	-0.222	-0.159	0.961	1.242	-0.514	-1.036	-2.115	-0.782
RLTR13C2	DNA	TcMar-Tigger	-0.073	-0.179	-0.393	0.059	0.025	-0.515	-0.501	-0.419	-0.47
MER70-int	DNA	TcMar-Tigger	0.015	-0.338	-0.411	-0.015	0.032	-0.516	-0.466	-0.596	-0.396
RMER21A	DNA	TcMar-Tc2	-0.192	-0.585	-0.392	-0.077	0.039	-0.531	-0.696	0.003	-0.523
RMER1A	DNA	hAT-Tip100	-0.188	-0.273	-0.271	0.092	0.386	-0.532	-0.567	-0.14	-0.143
Ricksha	Unknown	Unknown	-0.055	-0.009	0.193	-0.407	0.153	-0.536	-0.624	-0.408	-0.184
MER72	DNA	TcMar-Tc2	0.014	-0.466	-0.553	0.07	0.082	-0.537	-0.337	0.034	-0.241
MURVY-int	DNA	TcMar-Tigger	-0.045	-0.242	-0.381	0.181	0.347	-0.541	-0.573	-0.344	-0.431
ORR1A0	DNA	DNA	-0.047	-0.279	-0.741	0.301	-0.112	-0.541	-0.463	-0.762	-0.862
RLTR21	DNA?	DNA?	-0.099	-0.138	-0.669	-0.664	0.221	-0.545	-1.196	-0.11	-0.874
RLTR17	LTR	ERV1	-0.085	-0.35	-0.38	-0.036	-0.002	-0.547	-0.572	0.109	0.204
MER133A	LTR	ERVL	0.055	-0.156	-0.202	0.168	0.172	-0.551	-0.531	-0.131	0.025
(CGGGGG)n	DNA?	DNA?	0.3	-0.14	0	-0.178	-0.291	-0.553	-0.223	-0.538	-0.15
MT2C_Mm	LTR	ERV1	-0.034	-0.207	-0.113	-0.123	-0.145	-0.554	-0.496	0.084	0.153
(CATCC)n	Unknown	Unknown	0.394	0.215	0.342	0.019	-0.295	-0.556	-0.428	0.061	0.126
(CAGC)n	snRNA	snRNA	0.48	-0.799	-0.586	0.33	0.531	-0.561	-0.37	-1.487	-0.635
RLTR6_Mm	LTR	ERV1	-0.135	-0.3	0.526	0.005	-0.17	-0.561	-0.447	0.502	0.144
MLT1E	DNA	hAT-Charlie	-0.009	-0.184	-0.237	0.201	0.113	-0.562	-0.842	0.01	0.05
Kanga1b	DNA?	DNA?	0.141	-0.879	-0.606	0.026	-0.312	-0.564	-1.469	-0.699	-1.148
RLTR18	DNA	hAT-Tip100	-0.085	-0.088	-0.262	-0.262	-0.241	-0.568	-0.536	0.021	0.043
MamRep605	tRNA	tRNA	0.077	-0.187	-0.401	1.172	1.631	-0.569	-0.877	-0.772	-0.27
MLT2C1	LTR	ERV1	-0.025	-0.292	-0.361	0.035	0.013	-0.572	-0.427	-0.059	-0.102
tRNA-Ser-AGY	LINE?	Penelope?	-0.356	-0.467	-0.511	-0.41	-0.616	-0.574	-0.449	-0.378	-0.68
tRNA-Ile-ATA	LTR	ERV1	-0.314	-0.305	0.093	0.508	-0.29	-0.575	-0.512	0.098	-0.016
RLTR20B3	Simple_repeat	Simple_repeat	-0.098	-0.337	-0.295	-0.41	-0.306	-0.576	-0.434	-0.165	-0.071
Kanga1c	LTR	ERVL-MaLR	0.141	-0.455	-0.559	-0.317	-0.338	-0.578	-0.17	-0.137	-0.715
LTR52	DNA?	DNA?	0.107	-0.218	-0.051	0.146	-0.051	-0.578	-0.127	-0.311	-0.701
MER83B-int	LTR	ERV1	0.008	-0.619	-0.348	-0.142	0.063	-0.578	-0.514	0.254	-0.3
MER3	DNA	DNA	0.049	-0.538	-0.314	-0.573	-0.012	-0.581	-1.733	0.286	0.536
UCON2	rRNA	rRNA	-0.742	-0.895	-0.84	0.682	1.493	-0.581	-0.571	-0.351	-0.265
UCON28a	rRNA	rRNA	-0.943	-1.066	-1.136	0.889	1.751	-0.581	-0.684	-0.417	-0.311
BLACKJACK	LTR	ERV1	0.213	-0.009	-0.053	0.138	0.019	-0.582	0.004	0.237	0.432
MER102b	DNA	TcMar?	0.073	-0.378	-0.291	-0.162	-0.326	-0.584	-0.598	-0.428	-0.666
LTR90B	LTR	ERV1	0.086	-0.31	-0.403	-0.153	-0.283	-0.585	-0.504	-0.094	-0.318
(CACG)n	Simple_repeat	Simple_repeat	0.54	-0.421	0.006	0.15	0.02	-0.586	-0.125	0.575	0.192
MLT1J2	LTR	ERVK	-0.018	-0.311	-0.329	-0.17	-0.202	-0.588	-0.536	0.246	0.148
UCON9	DNA	TcMar-Tigger	-1.444	-0.528	-1.326	-0.798	-0.738	-0.59	-0.846	-1.392	-0.565
RLTR13B1	LINE	RTE	-0.07	-0.316	-0.342	0.084	0.105	-0.591	-0.589	-0.181	-0.285
UCON23	snRNA	snRNA	-0.831	0.361	-0.312	0.673	0.423	-0.592	-1.029	-0.476	-0.608
RLTR44C	DNA	DNA	-0.125	-0.426	-0.407	-0.027	0.358	-0.593	-0.561	0.026	-0.589
MER127	LTR	ERVK	0.057	-0.328	-0.345	-0.218	-0.269	-0.598	-0.305	-0.154	-0.397
MER21C	LTR	ERV1	0.052	-0.355	-0.354	0.179	0.391	-0.598	-0.484	-0.207	0.132
MER82	DNA	TcMar-Tc2	0.008	-0.364	-0.349	0.021	-0.004	-0.598	-0.533	0.104	0.203
MER53	LTR	ERV1	0.03	-0.358	-0.43	-0.008	-0.257	-0.605	-0.468	0.002	-0.108
(CACTG)n	Simple_repeat	Simple_repeat	0.51	0.313	-0.185	0.04	0.652	-0.607	1.09	-3.296	-2.777
RLTR41	SINE?	SINE?	-0.121	-0.329	-0.584	0.237	0.321	-0.608	-0.485	-0.187	-0.316
RMER10A	LINE	RTE-X	-0.148	-0.368	-0.477	-0.013	-0.458	-0.62	-0.743	0.144	-0.026
MER72B	LTR	ERV1	0.014	-0.167	-0.415	-0.074	-0.179	-0.621	-0.604	0	-0.067
MER89-int	DNA	hAT-Tip100	0.006	-0.281	-0.37	-0.052	0.034	-0.622	-0.678	-0.122	-0.038
MER45A	DNA	hAT-Blackjack	0.039	-0.013	-0.305	0.188	0.308	-0.63	-0.554	-0.314	-0.272
MLT2C2	DNA	TcMar-Tigger	-0.025	-0.26	-0.412	0.161	0.049	-0.632	-0.68	-0.139	-0.541
RLTRETN_Mm	DNA	TcMar-Tigger	-0.147	-0.33	-0.422	0.369	0.21	-0.639	-0.493	-0.452	-0.576
MLT1-int	LTR	ERVK	-0.017	-0.63	-0.658	-0.304	-0.321	-0.64	-0.176	-0.197	-0.556
RMER1C	SINE	Alu	-0.19	0.007	-0.129	-0.057	0.058	-0.64	-0.372	-0.599	-0.296
MER57A-int	DNA	DNA	0.029	-0.073	-0.239	-0.045	0.537	-0.642	-0.433	0.072	0.319
MER54B	DNA	hAT-Tip100	0.029	-0.082	-0.211	0.228	0.213	-0.643	-0.711	-0.223	0.003
MER97a	DNA	TcMar-Tigger	0	-0.399	-0.442	0.051	0.072	-0.644	-0.513	-0.651	-0.698
RLTR44E	DNA	hAT-Charlie	-0.125	-0.16	-0.259	0.094	0.075	-0.645	-0.58	-0.318	-0.216
MLT1H-int	DNA	DNA	-0.017	-0.353	-0.241	-0.081	-0.224	-0.648	-0.402	-0.074	-0.393
(CCGG)n	tRNA	tRNA	0.353	-1.046	0.075	-0.121	-0.057	-0.65	-1.825	-0.414	0.27
RLTR13B2	DNA	TcMar-Tigger	-0.07	-0.313	-0.372	0.337	0.283	-0.652	-0.766	-0.391	-0.586
MamGypLTR1b	LTR	LTR	0.082	-0.13	-0.033	0.669	0.53	-0.664	-0.691	0.006	-0.207
LTR29	LTR	ERV1	0.122	-0.072	-1.05	-0.341	-1.175	-0.671	0.544	0.453	0.098
RMER21B	DNA	TcMar-Mariner	-0.192	-0.286	-0.356	0.261	0.475	-0.673	-0.815	-0.032	-0.206
RMER3D-int	DNA?	DNA?	-0.203	-0.579	-0.518	0.204	0.126	-0.674	-0.912	0.089	-0.222
RLTR42	LTR	ERV1	-0.121	-0.313	-0.475	0.141	0.365	-0.675	-0.731	-0.159	-0.404
MLT2B5	DNA	hAT-Tip100	-0.025	-0.422	-0.502	-0.13	-0.355	-0.681	-0.856	-0.014	-0.11
(CAA)n	Simple_repeat	Simple_repeat	1.906	0.011	0.469	0.693	0.959	-0.684	0.886	-1.124	-0.453
(CAAAT)n	Simple_repeat	Simple_repeat	1.29	0.859	1.568	-0.892	-0.626	-0.684	0.355	1.683	1.868
(CAACT)n	Simple_repeat	Simple_repeat	0.842	1.389	-0.017	-0.892	0.511	-0.684	-0.007	0.098	0.032
RLTR13B4	LTR	ERV1	-0.072	-0.476	-0.147	-0.082	0.141	-0.684	-0.316	-0.063	-0.141
RLTR18-int	DNA	TcMar-Tc2	-0.086	-0.431	-0.5	0.024	0.144	-0.684	-0.522	-0.651	-0.558
tRNA-Ile-ATT	DNA	TcMar-Tigger	-0.315	-0.076	-0.335	0.583	0.561	-0.688	-1.039	-0.843	-0.752
U13_	Simple_repeat	Simple_repeat	-0.519	-0.053	-0.021	-0.379	-0.518	-0.688	-0.751	0.077	0.331
RLTR33	LTR	ERVK	-0.116	-0.188	-0.285	0.031	0.243	-0.691	-0.675	-0.34	0.132
Ricksha_c	DNA	TcMar-Tigger	-0.058	-0.268	-0.377	0.118	0.156	-0.693	-0.687	-0.232	-0.151
RLTR31_Mur	DNA	TcMar-Tigger	-0.114	-0.312	-0.378	0.267	0.389	-0.697	-0.688	-0.5	-0.624
PB1	DNA	TcMar-Tigger	-0.052	-0.318	-0.325	0.234	0.412	-0.699	-0.667	-0.495	-0.404
RLTR9A2	DNA	hAT-Charlie	-0.137	-0.246	-0.339	0.094	0.151	-0.702	-0.731	-0.31	-0.382
RLTR13D2	LTR	ERVL-MaLR	-0.076	-0.475	-0.607	-0.094	-0.063	-0.703	-0.565	-0.559	-0.671
tRNA-Arg-AGG	LTR	ERV1	-0.281	-0.312	-0.046	-0.185	-0.095	-0.703	-0.579	0.224	0.129
RLTR3_Mm	LTR	ERVL	-0.109	-0.393	-0.352	-0.055	-0.148	-0.705	-0.713	-0.342	-0.207
tRNA-Arg-AGA	DNA	hAT-Charlie	-0.279	-0.469	-0.509	0.111	0.188	-0.708	-0.71	-0.474	-0.548
RLTR43B	DNA	MULE-MuDR	-0.122	-0.477	-0.739	0.022	-0.109	-0.71	-0.591	0.109	-0.704
RLTR25B	DNA	TcMar-Tigger	-0.103	-0.264	-0.396	0.08	0.163	-0.711	-0.634	-0.657	-0.747
RLTR10D	DNA	TcMar-Tigger	-0.062	-0.304	-0.397	0.213	0.274	-0.714	-0.655	-0.496	-0.506
MTE2a	RC?	Helitron?	-0.041	-0.379	-0.543	0.171	0.072	-0.716	-0.458	-0.043	-0.092
RLTR4_MM-int	DNA?	DNA?	-0.117	-1.606	-0.511	-0.815	-0.716	-0.716	-0.175	-2.004	-0.732
RMER16-int	Satellite	Satellite	-0.167	-1.001	-1.563	-0.499	-0.549	-0.723	0.265	-3.551	-4.518
tRNA-Leu-CTY	DNA	hAT-Charlie	-0.319	-0.474	-0.466	0.548	0.677	-0.723	-0.677	-0.086	-0.106
MLT1G3	DNA	TcMar-Tigger	-0.013	-0.151	-0.452	0.337	0.387	-0.726	-0.634	-0.284	-0.589
RLTR28	DNA	hAT-Charlie	-0.108	-0.192	-0.513	0.121	0.181	-0.727	-0.974	-0.508	-1.041
MER70B	DNA	TcMar-Tc2	0.015	-0.393	-0.598	0.22	0.476	-0.728	-0.64	-0.33	-0.431
RLTR9E	DNA	hAT-Charlie	-0.142	-0.201	-0.295	0.062	0.036	-0.728	-0.666	-0.449	-0.4
Tigger16a	DNA	hAT-Charlie	-0.241	-0.192	-0.371	0.153	0.068	-0.728	-0.747	-0.363	-0.565
UCON17	tRNA	tRNA	-0.703	-0.882	-0.062	0.537	1.516	-0.729	-0.9	-3.603	-2.083
RLTR4_Mm	Simple_repeat	Simple_repeat	-0.117	0.634	0.344	0.738	1.166	-0.733	-0.695	1.401	1.163
MARNA	DNA?	DNA?	0.074	0.077	-0.545	-0.524	-0.637	-0.736	-1.268	0.126	0.288
RLTR15	Simple_repeat	Simple_repeat	-0.084	-0.171	0.279	-0.095	0.632	-0.74	-0.031	-0.981	-0.475
MER102c	LTR	ERV1	0.073	-0.482	-0.593	-0.275	-0.301	-0.743	-0.517	-0.555	-1.094
MLT1J	DNA	TcMar-Tc2	-0.018	-0.291	-0.361	0.017	0.176	-0.75	-0.785	-0.029	-0.357
U1	Simple_repeat	Simple_repeat	-0.502	-0.196	0.22	-0.438	-0.445	-0.75	0.282	-1.124	0.204
RMER6A	DNA	MULE-MuDR	-0.209	-0.231	-0.513	0.005	0.004	-0.753	-0.791	-0.489	-0.395
MLT2B3	DNA	hAT-Blackjack	-0.022	-0.328	-0.268	0.031	0.109	-0.754	-0.719	-0.184	-0.181
MER50-int	snRNA	snRNA	0.033	-0.263	-0.536	0.21	0.215	-0.756	-0.618	-0.234	-0.36
SSU-rRNA_Hsa	snRNA	snRNA	-0.22	-0.375	-0.762	0.373	0.469	-0.756	-0.501	-0.552	-0.761
RLTR20B1	Simple_repeat	Simple_repeat	-0.096	-0.592	-0.505	-0.47	-0.391	-0.757	-0.412	-0.353	-0.225
tRNA-Thr-ACA	DNA	hAT-Charlie	-0.398	-0.597	-0.596	-0.156	-0.166	-0.759	-0.753	-0.234	-0.327
UCON12	tRNA	tRNA	-0.627	-0.321	-0.493	0.902	1.444	-0.764	-0.824	-0.864	-0.319
UCON28c	LTR	ERV1	-0.988	-0.406	-1.257	-0.052	0.161	-0.767	-1.346	-0.47	-0.44
RLTR13A	Simple_repeat	Simple_repeat	-0.068	-0.305	-0.104	-0.109	-0.238	-0.772	-0.446	-0.704	-1.506
Tigger6a	DNA	TcMar-Tigger	-0.249	-0.324	-0.426	0.351	0.218	-0.772	-0.631	-0.188	-0.315
RMER19B	LTR	ERVL	-0.185	-0.429	-0.353	0.041	0.402	-0.775	-0.431	-0.082	-0.382
RLTR31_Mm	LINE	L1	-0.113	-0.439	-0.475	0.025	0.028	-0.776	-0.739	-0.051	-0.106
MLT1F	LTR	ERV1	-0.01	-0.507	-0.347	-0.125	0.012	-0.778	-0.521	-0.267	-0.158
MER21B	LTR	ERVK	0.053	-0.662	-0.719	-0.25	-0.352	-0.79	-0.458	-0.62	-1.109
MER91B	LTR	ERVK	0.005	-0.53	-0.568	-0.161	-0.174	-0.79	-0.527	-0.333	-0.57
RLTR1	DNA	hAT-Charlie	-0.06	-0.449	-0.559	-0.05	-0.054	-0.795	-0.712	-0.381	-0.382
MER67B	Unknown	Unknown	0.017	-0.668	-0.589	0.44	0.805	-0.796	-0.629	-0.19	-0.517
RSINE1	DNA	hAT-Charlie	-0.22	-0.583	-0.298	0.387	0.602	-0.797	-0.699	-0.227	-0.143
tRNA-Gly-GGG	DNA	hAT-Charlie	-0.301	-0.438	-0.495	0.029	0.3	-0.801	-0.857	-0.133	-0.336
RLTR30	DNA	hAT-Tip100	-0.109	-0.374	-0.438	-0.136	-0.091	-0.807	-0.9	-0.26	-0.377
MTB_Mm	DNA	hAT-Charlie	-0.038	-0.199	-0.369	0.143	0.121	-0.814	-0.854	-0.341	-0.442
tRNA-Asn-AAC	LTR	ERV1	-0.285	-0.207	-0.32	-0.859	-1.45	-0.822	-0.796	0.196	0.221
MLT1A0	Unknown	Unknown	-0.005	-0.211	-0.148	0.199	0.138	-0.833	-0.871	0.339	-0.435
(GGGAGA)n	tRNA	tRNA	0.268	-0.084	-0.482	0.463	0.762	-0.84	-0.268	0.653	1.249
tRNA-Pro-CCY	DNA?	DNA?	-0.352	-0.548	-0.7	-0.072	-0.031	-0.847	-0.758	-0.162	-0.301
RMER17C	DNA	hAT-Charlie	-0.175	-0.661	-0.606	0.103	0.232	-0.848	-0.901	-0.371	-0.482
(CACAG)n	Simple_repeat	Simple_repeat	0.638	-0.641	1.257	0.33	1.758	-0.851	0.44	1.031	0.965
RLTR27	Unknown	Unknown	-0.105	-0.452	-0.774	0.046	-0.078	-0.851	-1.01	-0.772	-0.934
MER66B	LTR	ERV1	0.018	-0.203	-0.508	-0.003	-0.011	-0.855	-1.011	-0.547	-0.492
tRNA-His-CAY_	DNA	hAT-Tip100	-0.31	-0.236	-0.39	0.474	0.408	-0.857	-0.94	-0.005	0.223
RLTR1C	DNA	DNA	-0.094	-0.462	-0.398	0.176	0.162	-0.861	-0.88	-0.174	-0.21
Tigger12	LTR	Gypsy	-0.23	-0.363	-0.518	0.023	0.221	-0.866	-0.958	-0.122	-0.333
RMER15	RC	Helitron	-0.164	-0.731	-0.38	0.079	0.274	-0.868	-0.783	-0.55	-1.184
MER102a	DNA	TcMar-Tigger	0.074	-0.557	-0.507	0.157	0.224	-0.87	-0.669	-0.243	-0.691
(GGAGAA)n	Simple_repeat	Simple_repeat	0.273	-0.044	0.015	-0.106	-0.074	-0.871	-0.396	-0.405	-0.317
RMER17A	DNA	hAT-Charlie	-0.169	-0.415	-0.516	0.139	0.22	-0.871	-0.927	-0.414	-0.364
RLTR10B	DNA	TcMar-Tigger	-0.061	-0.482	-0.472	-0.032	0.119	-0.873	-0.826	-0.144	-0.228
(CTACT)n	tRNA	tRNA	0.295	0.383	0.522	0.792	0.701	-0.882	-0.98	1.468	1.15
MER58C	LTR	ERV1	0.025	-0.626	-0.653	0.902	0.716	-0.885	-1.129	0.174	-1.09
RMER13A	tRNA	tRNA	-0.161	-1.906	-1.04	0.547	0.84	-0.885	-1.516	0.443	-1.09
RLTR43A	DNA	hAT-Charlie	-0.122	-0.298	-0.244	0.269	0.396	-0.887	-0.856	-0.171	-0.228
RMER19C	DNA	hAT-Charlie	-0.186	-0.555	-0.624	0.059	0.036	-0.888	-0.868	-0.632	-0.711
RLTR9D	DNA	hAT-Tip100	-0.141	-0.51	-0.537	-0.063	0.029	-0.889	-0.845	-0.106	-0.16
B1_Mm	Unknown	Unknown	0.234	-0.332	-0.34	0.09	-0.13	-0.896	-0.816	0.245	-0.316
RLTR19A	DNA	TcMar-Tc2	-0.087	-0.418	-0.279	0.233	0.27	-0.899	-0.761	0.08	0.036
Tigger7	DNA	TcMar	-0.253	-0.369	-0.507	0.007	0.074	-0.91	-0.997	-0.113	-0.27
(CGAG)n	LTR	ERV1	0.325	0.093	0.397	0.464	-0.289	-0.912	-1.117	0.355	1.361
L2	LTR	ERVL	0.139	-0.298	-0.668	-0.199	-0.305	-0.913	-0.656	-0.593	-0.895
RMER17A2	DNA	hAT-Charlie	-0.17	-0.466	-0.541	0.01	0.029	-0.918	-0.889	-0.596	-0.631
RMER30	DNA	hAT?	-0.196	-0.463	-0.373	0.119	0.117	-0.928	-0.824	0.092	0.085
U7	Simple_repeat	Simple_repeat	-0.598	-0.086	-0.659	-0.103	0.649	-0.928	-1.616	0.677	0.454
RLTR13D5	DNA	TcMar-Tigger	-0.079	-0.474	-0.594	-0.004	-0.02	-0.929	-0.863	-0.52	-0.456
MER76-int	Simple_repeat	Simple_repeat	0.011	-0.191	-0.113	-0.238	-0.249	-0.931	-0.229	-0.846	-0.591
U3	tRNA	tRNA	-0.547	-1.826	-0.268	0.33	2.292	-0.936	-2.329	-2.224	-2.29
U17	Satellite	centr	-0.547	0.496	-1.853	-0.407	-0.878	-0.936	-2.329	-0.639	-2.29
Zaphod2	tRNA	tRNA	-2.132	0.496	0.262	-0.769	-1.726	-0.936	-1.107	-3.809	-2.29
MADE2	DNA	hAT-Charlie	0.083	-0.358	-0.256	0.101	0.333	-0.939	-0.905	-0.658	-0.496
tRNA-Ser-TCA_	DNA?	DNA?	-0.365	0.011	-0.051	-0.587	-0.294	-0.944	-0.925	-0.227	-0.713
Tigger10	DNA	TcMar-Tigger	-0.224	-0.564	-0.707	0.059	0.183	-0.945	-0.985	-0.822	-1.055
MER20	LTR	ERVK	0.053	-0.771	-0.859	-0.239	-0.364	-0.952	-0.605	-0.429	-0.914
RLTR44D	DNA	hAT-Tip100	-0.125	-0.741	-0.468	0.267	0.341	-0.958	-0.909	-0.405	-0.187
UCON22	Simple_repeat	Simple_repeat	-0.815	-0.033	-0.334	0.057	0.878	-0.965	-0.888	-1.044	0.709
Tigger9b	LTR	ERV1	-0.259	-0.244	-0.617	0.321	0.431	-0.968	-0.581	-0.717	-0.478
RLTR45	DNA	hAT-Tip100	-0.129	-0.479	-0.525	-0.116	-0.06	-0.97	-0.85	-0.269	-0.375
tRNA-Gln-CAA_	DNA	hAT-Charlie	-0.291	-0.519	-0.604	-0.047	0.027	-0.971	-1.04	-0.525	-0.596
RLTR24	LTR	ERVK	-0.102	-0.636	-0.738	-0.112	-0.126	-0.973	-0.78	-0.344	-0.264
RLTR28B	DNA	hAT-Charlie	-0.109	-0.494	-0.825	0.469	0.637	-0.976	-0.96	-0.937	-0.958
RLTR40	DNA?	DNA?	-0.117	-0.165	-0.482	0.129	-0.209	-0.988	-0.816	0.215	-0.221
Tigger2b	DNA	DNA	-0.246	-0.647	-0.539	0.369	0.251	-0.99	-0.931	-0.832	-0.852
RLTR1B-int	DNA	hAT-Charlie	-0.093	-0.416	-0.895	0.221	-0.197	-0.994	-1.036	-0.4	-0.819
tRNA-Leu-TTA(m)	Unknown	Unknown	-0.326	-0.02	-0.011	-0.424	-0.219	-0.997	-0.352	-0.889	-0.722
UCON24	DNA	hAT?	-0.849	-0.651	-0.421	0.11	-0.219	-0.997	-1.401	-1.365	-0.484
RLTR26	RC	Helitron	-0.105	-0.518	-0.843	-0.139	-0.119	-1.004	-0.862	-0.707	-0.679
tRNA-Cys-TGY	Unknown	Unknown	-0.289	-0.465	-0.733	-0.208	-0.11	-1.017	-0.67	-0.291	-0.544
LTR31	DNA	hAT-Charlie	0.121	-0.588	-0.58	0.051	0.324	-1.021	-0.696	-0.223	-0.543
LTR88c	tRNA	tRNA	0.089	-0.742	-0.369	-0.343	0.872	-1.037	-0.605	0.405	-0.721
MER67C	Unknown	Unknown	0.017	-0.432	-0.399	-0.423	-0.666	-1.037	-0.441	-1.261	-1.061
RMER17B	DNA	TcMar-Tigger	-0.174	-0.471	-0.672	0.062	0.035	-1.038	-1.018	-0.393	-0.442
tRNA-Lys-AAA	Unknown	Unknown	-0.328	-0.321	-0.493	0.109	0.076	-1.038	-0.782	0.304	0.266
RLTR13A2	Low_complexity	Low_complexity	-0.068	0.494	0.043	0.508	0.798	-1.04	-1.214	1.267	1.036
RMER6B	DNA	hAT-Charlie	-0.211	-0.562	-0.617	0.18	0.239	-1.04	-0.9	-0.598	-0.597
RMER19A	DNA	TcMar-Tigger	-0.181	-0.562	-0.626	0.185	0.317	-1.048	-0.936	-0.556	-0.756
RLTR11A2	DNA	hAT-Charlie	-0.066	-0.582	-0.616	0.099	0.004	-1.05	-0.95	-0.589	-0.515
tRNA-Arg-CGA_	Unknown	Unknown	-0.283	-0.201	-0.554	0.539	0.37	-1.05	-0.97	-1.155	-1.221
tRNA-Tyr-TAT	Unknown	Unknown	-0.439	-0.56	-0.804	-0.148	0.252	-1.055	-0.863	-0.77	-1.037
RLTR45-int	DNA	hAT-Charlie	-0.13	-0.597	-0.58	0.024	0	-1.056	-0.805	-0.634	-0.665
RMER6-int	DNA	hAT-Charlie	-0.213	-0.626	-0.876	0.279	0.414	-1.06	-1.116	-0.571	-0.547
tRNA-Thr-ACY	LINE	RTE	-0.429	-0.684	-0.363	-0.056	-0.206	-1.063	-0.684	-0.701	-0.273
MMAR1	LTR	ERV1	-0.027	-0.641	-0.618	-0.156	-0.184	-1.065	-0.861	-0.277	-0.313
RMER17D	DNA	hAT-Charlie	-0.18	-0.593	-0.705	0.142	0.201	-1.069	-0.951	-0.84	-0.961
MamRep137	DNA	TcMar-Tigger	0.08	-0.689	-0.765	-0.124	-0.12	-1.08	-0.915	-0.281	-0.329
MLT1D	DNA	hAT-Charlie	-0.009	-0.431	-0.198	-0.218	-0.088	-1.081	-0.992	0.018	-0.12
RMER12B	DNA	hAT-Tip100	-0.16	-0.275	-0.351	0.027	0.036	-1.081	-1.063	-0.301	-0.289
tRNA-Met-i	tRNA	tRNA	-0.34	-3.204	0.469	1.153	1.288	-1.092	-3.708	-0.143	0.724
U4	tRNA	tRNA	-0.572	0.496	-0.729	1.067	1.342	-1.092	-0.339	1.499	-1.347
UCON18	tRNA	tRNA	-0.709	-0.688	-0.431	0.051	0.91	-1.098	-0.996	0.408	1.015
Tigger12A	DNA	hAT-Charlie	-0.232	-0.641	-0.459	0.224	0.533	-1.099	-1.086	-0.663	-0.655
ORR1A1-int	DNA	TcMar-Tigger	-0.048	-0.721	-0.814	-0.013	0.058	-1.101	-1.026	-0.48	-0.583
(CCCA)n	snRNA	snRNA	0.375	-1.606	-1.633	0.29	0.145	-1.103	-0.175	-0.477	-1.3
RLTR44B	DNA	hAT-Charlie	-0.123	-0.732	-0.651	0.357	0.416	-1.104	-1.033	-0.942	-0.698
tRNA-Asp-GAY	LTR	ERV1	-0.287	-0.739	-0.904	0.083	0.146	-1.105	-1.034	-0.57	-0.705
MLT1E2	DNA	hAT-Charlie	-0.01	-0.472	-0.678	0.18	0.301	-1.108	-1.12	-0.245	-0.359
(CAGAA)n	Simple_repeat	Simple_repeat	0.493	-0.098	-0.137	0.346	0.629	-1.112	-0.548	-0.455	-0.398
LTR84b	DNA	hAT-Tip100	0.097	-0.935	-0.859	0.028	0.2	-1.112	-1.019	-0.007	-0.153
UCON19	DNA?	DNA?	-0.727	-0.376	-0.122	-0.375	-0.406	-1.116	-0.598	-0.53	-0.453
RMER17C-int	LINE	L1	-0.177	-0.683	-0.86	0.136	0.176	-1.118	-1.019	-0.309	-0.507
tRNA-Ala-GCY	DNA	TcMar?	-0.276	-0.576	-0.829	0.431	0.616	-1.118	-1.107	-0.528	-0.662
tRNA-Leu-CTG	DNA	hAT-Tip100	-0.318	-0.51	-0.801	-0.053	-0.109	-1.119	-0.928	-0.516	-0.546
RLTR6-int	Simple_repeat	Simple_repeat	-0.136	-0.147	-0.279	-0.591	-0.241	-1.12	-0.755	-0.763	-1.086
Charlie11	Simple_repeat	Simple_repeat	0.204	-0.31	-0.313	-0.153	-0.055	-1.128	-0.449	-0.32	-0.449
Arthur1B	Simple_repeat	Simple_repeat	0.235	-1.574	0.164	0.081	-0.141	-1.132	-0.43	-1.356	-1.553
RMER3D2	DNA	hAT-Charlie	-0.2	-0.563	-0.718	0.059	0.107	-1.139	-1.065	-0.554	-0.647
SRV_MM-int	DNA	TcMar-Tigger	-0.22	-0.404	-0.683	0.11	0.457	-1.15	-0.846	-0.648	-0.739
RMER4B	DNA	hAT-Charlie	-0.204	-0.71	-0.709	-0.066	-0.043	-1.159	-1.001	-0.525	-0.684
RLTR47_MM	DNA	hAT-Blackjack	-0.133	-0.826	-0.87	-0.217	-0.288	-1.178	-1.072	-0.923	-1.05
RMER6D	DNA	TcMar-Mariner	-0.213	-0.573	-0.813	-0.117	-0.164	-1.182	-0.698	-0.498	-0.794
MER97b	Unknown	Unknown	0	-1.246	-1.087	-0.715	-0.474	-1.184	-1.053	-0.947	-1.614
tRNA-Met	DNA	hAT-Charlie	-0.332	-0.739	-0.941	-0.03	-0.007	-1.19	-0.916	-0.874	-0.636
RLTR19C	LTR	ERV1	-0.091	-0.704	-0.824	-0.005	0.033	-1.199	-0.923	-0.291	-0.667
RMER1B	DNA	hAT-Tip100	-0.188	-0.569	-0.528	-0.015	0.069	-1.213	-1.145	-0.412	-0.14
RLTR25A	Simple_repeat	Simple_repeat	-0.103	0.593	-0.359	0.297	1.082	-1.215	-0.958	0.666	0.578
MER97c	Simple_repeat	Simple_repeat	-0.001	-0.076	-0.284	0.211	-0.448	-1.223	-1.208	-0.358	-0.424
RMER5	Simple_repeat	Simple_repeat	-0.205	-0.699	-0.623	-0.523	-0.378	-1.224	-0.688	-0.697	-0.602
tRNA-Met_	scRNA	scRNA	-0.34	0.255	-2.495	-0.2	0	-1.236	-0.649	-0.94	-1.553
RMER6C	LTR	ERV1	-0.212	-0.749	-1.023	-0.007	0.266	-1.243	-1.33	-0.166	0.244
tRNA-Leu-CTA	DNA	hAT-Charlie	-0.317	-0.763	-0.534	0.042	0.118	-1.243	-1.224	-0.947	-0.949
RLTR23	DNA	TcMar-Tigger	-0.1	-0.672	-0.676	0.139	0.083	-1.244	-1.156	-0.973	-0.911
Tigger14a	LTR	ERV1	-0.24	-2.136	-0.578	-0.376	-0.141	-1.246	-1.792	-0.101	-3.337
RMER17D2	DNA	hAT?	-0.18	-0.514	-0.823	0.096	0.052	-1.264	-0.922	-0.473	-0.766
RLTR13D1	DNA	hAT-Charlie	-0.076	-0.431	-0.651	0.34	0.476	-1.272	-1.127	-0.393	-0.215
RLTR18B	Simple_repeat	Simple_repeat	-0.086	-0.532	-0.625	-0.195	-0.223	-1.279	-1.001	-1.426	-1.33
Tigger9a	tRNA	tRNA	-0.257	0.049	-1.116	-0.769	-0.588	-1.298	-1.592	-1.487	-2.29
RMER2	DNA	hAT-Charlie	-0.19	-0.587	-0.644	0.103	0.104	-1.3	-1.211	-0.82	-0.801
MurSatRep1	Simple_repeat	Simple_repeat	-0.045	-0.37	-0.644	-1.08	-0.749	-1.312	-0.819	-1.312	-0.625
RMER3D3	DNA	hAT	-0.2	-0.63	-0.846	-0.046	0.019	-1.319	-1.241	-0.614	-0.75
Cheshire	tRNA	tRNA	0.19	-0.156	-1.406	1.263	2.072	-1.336	-1.882	-1.04	-1.106
RLTR22_Mus	snRNA	snRNA	-0.099	0.207	-1.406	2.704	3.114	-1.336	-0.007	-1.777	-3.427
UCON28b	tRNA	tRNA	-0.947	-0.156	-1.406	0.495	1.258	-1.336	-0.528	-1.777	-1.842
URR1B	Simple_repeat	Simple_repeat	-1.684	0.737	0.469	0.041	0.1	-1.336	0.926	0.339	-0.62
Tigger6b	DNA	hAT-Charlie	-0.252	-0.604	-0.717	-0.058	0.006	-1.351	-1.174	-0.409	-0.691
Tigger15a	DNA	TcMar-Tc2	-0.24	-0.796	-0.89	0.153	0.136	-1.362	-1.1	-0.886	-1.21
MLT-int	DNA	DNA	-0.027	-0.738	-0.765	0.009	0.058	-1.367	-1.124	-0.676	-1.344
MLT1K	DNA	MULE-MuDR	-0.019	-0.438	-1.057	-0.186	-0.04	-1.382	-1.19	-0.649	-0.874
tRNA-Arg-CGG	Unknown	Unknown	-0.284	-0.788	-1.159	-0.445	-0.615	-1.384	-1.326	-0.265	-2.047
tRNA-Leu-TTA	DNA?	DNA?	-0.324	-0.9	-1.321	0.042	-0.181	-1.398	-0.789	-0.632	-1.056
tRNA-Ser-TCA	DNA	PiggyBac	-0.361	-0.926	-0.946	0.353	0.467	-1.402	-1.201	-1.254	-1.406
UCON20	DNA	hAT-Tip100	-0.769	-1.157	-0.556	-0.535	-0.542	-1.405	-1.511	-0.542	-0.263
MER94	Unknown	Unknown	0.003	-0.815	-0.778	-0.488	-0.476	-1.443	-0.614	-0.618	-0.92
SYNREP_MM	DNA	hAT-Charlie	-0.222	-0.808	-1.23	0.218	0.215	-1.453	-1.298	-0.734	-1.156
LTR16B	LTR	ERV1	0.133	-0.928	-0.956	-0.213	1.553	-1.479	-0.822	-1.668	-1.734
MamRep1894	Simple_repeat	Simple_repeat	0.079	0.951	1.269	0.933	1.171	-1.494	-0.239	0.628	0.406
RLTR44A	Simple_repeat	Simple_repeat	-0.123	-0.683	-0.739	-0.66	-0.283	-1.496	-0.983	-1.093	-0.892
Tigger1	DNA	hAT-Charlie	-0.222	-0.918	-1.027	-0.079	-0.064	-1.506	-1.271	-0.736	-0.981
tRNA-Arg-CGY_	DNA	hAT-Charlie	-0.285	-0.866	-1.02	-0.017	0.032	-1.522	-1.318	-0.961	-1.067
tRNA-Glu-GAG	Simple_repeat	Simple_repeat	-0.297	-0.805	-0.731	-0.487	-0.303	-1.522	-0.946	-0.766	-0.795
tRNA-Val-GTY	DNA	hAT-Tip100	-0.49	-0.76	-1.029	0.088	0.261	-1.527	-1.577	-0.841	-1.121
MER110A	tRNA	tRNA	0.067	-0.484	-0.592	0.71	1.053	-1.531	-0.771	0.384	-0.275
ORSL-2b	tRNA	tRNA	-0.051	-3.204	-0.91	-1.048	-1.519	-1.577	-2.123	-2.018	-2.083
(CAGAT)n	Simple_repeat	Simple_repeat	0.48	-0.138	1.043	-0.032	-0.275	-1.603	0.055	-1.306	-0.705
tRNA-Gln-CAA	Simple_repeat	Simple_repeat	-0.291	-0.89	-0.754	-0.516	-0.333	-1.613	-0.985	-0.818	-0.908
tRNA-Lys-AAG	DNA	hAT-Charlie	-0.329	-0.817	-0.953	-0.02	0.086	-1.634	-1.404	-1.221	-1.347
MLT1H	Simple_repeat	Simple_repeat	-0.015	-0.651	-0.66	-0.118	-0.187	-1.645	-1.323	-1.545	-1.59
RLTR9F	Simple_repeat	Simple_repeat	-0.143	-0.748	-0.733	-0.275	-0.113	-1.665	-1.093	-1.215	-0.985
RLTR10B2	LTR	ERV1	-0.061	-1.826	-1.368	-0.226	-0.878	-1.673	-1.192	-1.739	-3.027
MER92C	DNA	DNA	0.003	-0.737	-0.691	0.106	0.248	-1.676	-1.317	-0.556	-0.573
RLTR42-int	Simple_repeat	Simple_repeat	-0.122	-0.73	-0.832	-0.195	-0.286	-1.677	-1.289	-1.76	-1.77
(CACGC)n	Simple_repeat	Simple_repeat	0.521	0.297	-0.398	0.585	-0.237	-1.694	-2.154	0.273	0.911
UCON27	LTR	ERV1	-0.932	-0.069	-2.419	-0.021	-0.958	-1.708	-1.757	0.315	-1.09
UCON29	tRNA	tRNA	-1.01	-1.158	-1.417	0.932	1.433	-1.75	-1.773	-2.611	-1.985
Ricksha_b	DNA	DNA	-0.058	-0.356	-1.365	0.222	-0.389	-1.763	-1.398	-0.681	-1.472
Charlie4	Simple_repeat	Simple_repeat	0.19	0.496	-1.116	1.067	-0.141	-1.784	0.73	-1.487	-1.553
tRNA-Leu-CTA_	tRNA	tRNA	-0.317	-1.451	-2.701	-0.032	0.234	-1.784	-3.177	-3.072	-1.022
UCON26	tRNA	tRNA	-0.909	-1.826	-3.438	-1.992	-2.463	-1.784	-1.592	-0.639	-0.415
UCON8	tRNA	tRNA	-1.395	1.719	1.691	0.33	1.734	-1.784	-1.592	-1.487	1.254
UCON7	scRNA	scRNA	-1.395	-1.089	0.758	0.62	-1.726	-1.784	-0.855	0.098	0.321
Charlie26a	Simple_repeat	Simple_repeat	0.19	-1.151	-0.693	0.133	-0.741	-1.846	-1.474	-1.064	-0.999
tRNA-Arg-CGA	Simple_repeat	Simple_repeat	-0.283	-0.779	-0.795	-0.34	-0.05	-1.909	-1.261	-1.528	-1.475
tRNA-Ser-TCA(m)	Simple_repeat	Simple_repeat	-0.364	-1.089	-1.116	-0.649	0.126	-1.915	-1.868	-2.841	-3.269
tRNA-Thr-ACG_	Simple_repeat	Simple_repeat	-0.406	-1.272	-2.053	-0.026	-0.276	-1.919	-1.183	-2.695	-2.761
(CACTC)n	Simple_repeat	Simple_repeat	0.513	-0.363	-0.326	0.285	0.224	-1.948	-1.317	-1.678	-1.318
UCON10	DNA	hAT-Charlie	-0.606	-0.593	-0.975	-0.111	-0.079	-1.963	-1.719	-1.685	-1.564
tRNA-Tyr-TAC	DNA?	DNA?	-0.438	-3.591	-2.034	-1.435	0.02	-1.964	-1.773	-3.99	-4.055
RLTR13D4	Simple_repeat	Simple_repeat	-0.079	-0.694	-0.932	-0.216	-0.296	-1.967	-1.376	-2.734	-3.09
(CACAT)n	Simple_repeat	Simple_repeat	0.609	-0.423	-0.464	0.063	0.028	-1.98	-1.407	-1.295	-0.924
tRNA-Pro-CCA	DNA?	DNA?	-0.346	-1.182	-1.489	-0.761	-0.628	-1.991	-1.598	-1.301	-1.413
(CAGTA)n	tRNA	tRNA	0.431	-2.963	-2.991	0.958	1.258	-2.073	-1.882	-3.362	-3.427
tRNA-Glu-GAG_	DNA	DNA	-0.297	-1.052	-1.285	0.311	0.639	-2.086	-1.794	-1.37	-1.153
RLTR14-int	Simple_repeat	Simple_repeat	-0.083	-1.493	-1.293	-0.313	0.141	-2.108	-2.482	-1.736	-1.729
tRNA-Leu-TTG	Simple_repeat	Simple_repeat	-0.327	-0.759	-0.629	-0.529	-0.172	-2.188	-1.676	-1.426	-1.395
(CCGGG)n	Simple_repeat	Simple_repeat	0.349	-0.857	-0.782	0.244	0.321	-2.22	-0.987	-2.551	-2.617
MER66A	snRNA	snRNA	0.019	-0.985	-0.976	0.716	1.212	-2.275	-1.346	-1.72	-1.058
ORR1D2	Simple_repeat	Simple_repeat	-0.051	-0.882	-3.232	0.089	-0.671	-2.314	-0.007	0.645	-0.499
UCON21	Simple_repeat	Simple_repeat	-0.804	-1.36	-1.606	-0.275	-0.086	-2.322	-2.587	-2.481	-2.764
LTR50	Simple_repeat	Simple_repeat	0.107	-0.879	-0.606	0.085	-0.276	-2.473	-2.134	-1.503	-1.897
Charlie4a	Simple_repeat	Simple_repeat	0.19	-0.241	-1.853	-0.407	-0.878	-2.521	-0.744	0.098	-2.29
U2	scRNA	scRNA	-0.547	-0.241	-1.853	-1.992	1.238	-2.521	-2.329	-2.224	-2.29
U14	Simple_repeat	Simple_repeat	-0.547	-1.826	-0.631	0.816	-0.141	-2.521	-2.329	-1.002	-3.875
(CGG)n	Simple_repeat	Simple_repeat	0.308	-0.331	-0.359	-0.239	-0.169	-2.53	-1.762	-2.738	-2.449
IAPLTR4	Simple_repeat	Simple_repeat	0.149	-0.822	-0.805	0.091	0.229	-2.541	-1.693	-1.741	-1.89
ERVB3_1-LTR_MM	Simple_repeat	Simple_repeat	0.189	-0.517	-0.368	0.119	0.192	-2.549	-2.222	-2.559	-2.106
(CAGAC)n	Simple_repeat	Simple_repeat	0.491	-0.532	-0.463	0.234	0.279	-2.629	-2.202	-2.307	-2.059
(CATAT)n	Simple_repeat	Simple_repeat	0.397	-0.809	-0.813	0.066	-0.121	-2.695	-1.361	-2.572	-2.577
(CACGT)n	Simple_repeat	Simple_repeat	0.516	-0.662	-0.737	0.193	-0.036	-2.696	-2.151	-2.63	-2.361
tRNA-Trp-TGG	Simple_repeat	Simple_repeat	-0.437	-0.841	-0.463	-0.47	-0.361	-2.741	-2.512	-2.198	-2.2
MLT1E1A	Simple_repeat	Simple_repeat	-0.01	-0.433	-0.509	-0.254	-0.277	-2.819	-2.063	-2.697	-3.065
UCON15	DNA	hAT-Charlie	-0.676	-0.21	-2.163	-1.165	0.034	-2.831	-1.261	-3.271	-1.222
tRNA-Thr-ACG	Simple_repeat	Simple_repeat	-0.4	-0.721	-0.683	-0.392	-0.219	-2.927	-2.582	-2.985	-3.017
MER103	Simple_repeat	Simple_repeat	0.072	-0.491	-0.722	0.031	0.143	-2.955	-2.356	-3.629	-2.408
Zaphod3	tRNA	tRNA	-2.617	-0.726	-2.338	-0.892	-1.363	-3.006	-2.815	-2.709	-2.775
RLTR31B_Mm	Simple_repeat	Simple_repeat	-0.116	-0.451	-0.434	-0.317	-0.206	-3.024	-2.487	-3.138	-2.918
RMER13B	Low_complexity	Low_complexity	-0.164	-0.904	-0.922	-0.064	-0.075	-3.133	-2.741	-2.927	-3.108
Tigger5	tRNA	tRNA	-0.246	0.221	-2.47	0.936	1.402	-3.137	-0.624	-2.104	-4.492
MER119	Simple_repeat	Simple_repeat	0.061	-0.513	-0.73	0.276	0.042	-3.155	-2.227	-3.163	-3.229
MER54A	Simple_repeat	Simple_repeat	0.029	-0.78	-0.818	0.077	-0.05	-3.185	-2.777	-3.412	-3.195
MLT1L	Simple_repeat	Simple_repeat	-0.021	-0.625	-0.498	-0.225	-0.155	-3.247	-2.83	-3.557	-3.072
(CATTA)n	Simple_repeat	Simple_repeat	0.383	-0.285	-0.592	0.532	0.176	-3.271	-3.5	-3.763	-3.46
MMERGLN-int	Simple_repeat	Simple_repeat	-0.028	-3.015	-0.609	-0.859	-0.246	-3.71	-1.933	-2.928	-2.341
UCON5	tRNA	tRNA	-1.09	-0.784	-3.619	-0.587	0.527	-4.286	-0.635	-3.99	-4.055
LTR40c	Other	Other	0.11	-4.207	-0.421	-2.969	-1.068	-4.902	0.53	-3.021	-3.031
URR1A	Simple_repeat	Simple_repeat	-1.594	-0.998	-1.026	0.131	0.633	-5.153	-2.64	-2.534	-0.53
ZP3AR	tRNA	tRNA	-4.376	-7.105	-7.869	-6.134	-6.364	-6.952	-6.471	-7.503	-9.891

## Sheet: Table S4. ChIP primers
Supplemental Table 4. ChIP-qPCR primers and genomic location of amplicons
	Chr	Forward primer (F)	Genomic position (nt)
Amplicon		Reverse primer (R)	mm10 genome
R1	12	F: TGCCTGCACTAAGACTGGTG	115618453 - 115618583
		R: GCATGTGTCATGAGGTGTGG
R2	12	F: GTCTAGGGTTGTTAGGCCTCC	115616758 - 115616894
		R: GGATACCCAGACCTGACTTTGT
R3	4	F: CCAGAAGTCTGAGCCCCTTG	125848249 - 125848347
		R: AAGTTGCCGGCTAAGCATCT
R4	11	F: TAACCACCGTGTCTCTAAGCG	81201226 - 81201309
		R: TCCGGTGTGACTTAGCATGA
R5	1	F: GCCACCAACATGGAGTCAGA	190487280 - 190487361
		R: CAGGCTCTGAATGGAGCCAA
R6	6	F: CCTTGGCCCAGTCATGTAGG	110146000-110147000
		R: AGAGCATGAGTTCCTTGGGA
R7	12	F: TTTTGTTGCCCCTTGATTCAGTG	115613000-115614000
		R: ATTGACGTAGTACACAGCCAG
R8	5	F: TGCTGTGAGCATTTGGTCCT	126224000-126225000
		R: GCCTCCACCTCAGTCACTTC
R9	6	F: CTTTCAGAGTGAAGTGGGAATGC	80121000-80122000
		R: ACTCTTCGGAAGCCATACCAG
R10	7	F: AACAGCACTGATCGCAAGTG	129256000-129257000
		R: GGTCCCACTCCTGATAACGC
R11	10	F: GCCACTTGAGTAGGTGATTAATTCT	98331765 - 98331912
		R: AGCAGAGCTGCCATTGAATCTT
R12	10	F: CCTGCGTTCTACAATCGGGT	127092185 - 127092298
		R: TTGGTCCCAAATCTCAGGGC
R13	7	F: CACCGGCTTCACCGAATACT	25315585 - 25315719
		R: GGAGAGAAACGGGGTTCCG
R14	2	F: CCTGACTTTTACCGTCCCAATC	156231214 - 156231331
		R: TGCTACTACACAAGGCCCCAA
R15	16	F: GTTTTTCATCGGACGGTGGC	10796381- 10796520
		R: CCGCCGCTCATACACCATAA
R16	11	F: GTGCAAGCCTCCTACCTGAG	83525284 - 83525391
		R: GGGTGCTCCACCTTTCTACC
R17	8	F: AAGCTTTTGGGGTCCCTAGC	75100119 - 75100200
		R: GGTGAGGGAACTGTGTCAGG
R18	7	F: TACAGGGGAGGCTCACTTCA	26800200 - 26800301
		R: TGAGAGCCATGGTCAGTTGG
R19	8	F: TGGGCCTTGAAGATGGTGAC	17600674 - 17600744
		R: TGGTGTTTGTCTGTGCCTCA
Gapdh		F: GTTGCACTGGCCTAGCAAAG
promoter		R: GACCGGGATTCTTCACTCCG
Lmnb1	18	F: GGTCAAGTCATTGGTGGGCT
promoter		R: TCATTGGCTATGAACGCGGA
Ube2b		F: GCCGAACTTGAAACTAGCGAC
promoter		R: GTTGCTTGCGGGCAACTACG
Telomere		F: GGTTTTTGAGGGTGAGGG TGAGGGTGAGGGTGAGGGT
		R: TCCCGACTATCCCTATCCCTAT CCCTATCCCTATCCCTA
